# Supplementary material for: Comparing syngeneic and autochthonous models of breast cancer to identify tumor immune components that correlate with response to immunotherapy in breast cancer
Source: Springer Nature journal article supplement (doi:10.1186/s13058-021-01448-1), 2021-08-05
Supplement: MOESM1 [file 19546210]

**Lal et al. Figure 1. The number of cancer cells inoculated in pre-clinical models influences tumor growth kinetics as well as the tumor microenvironment.**

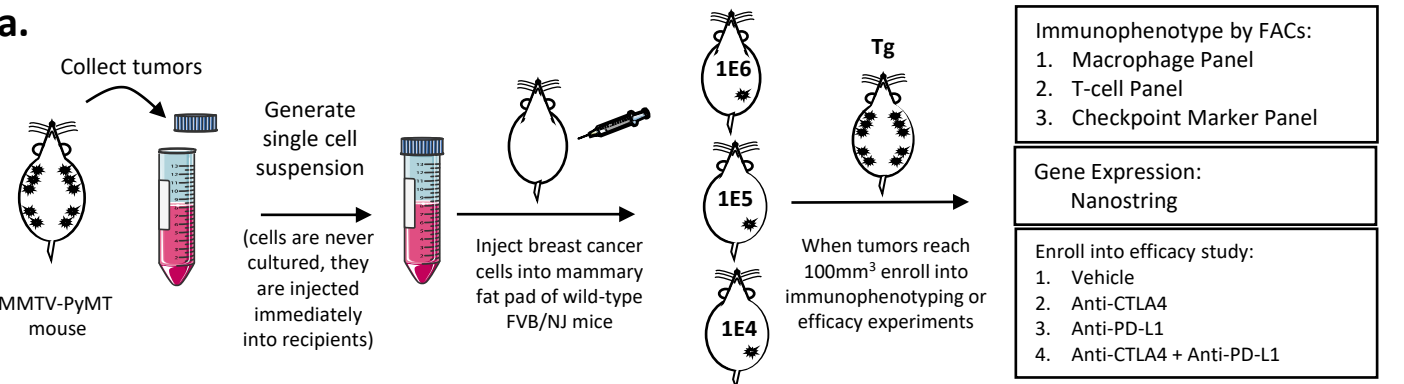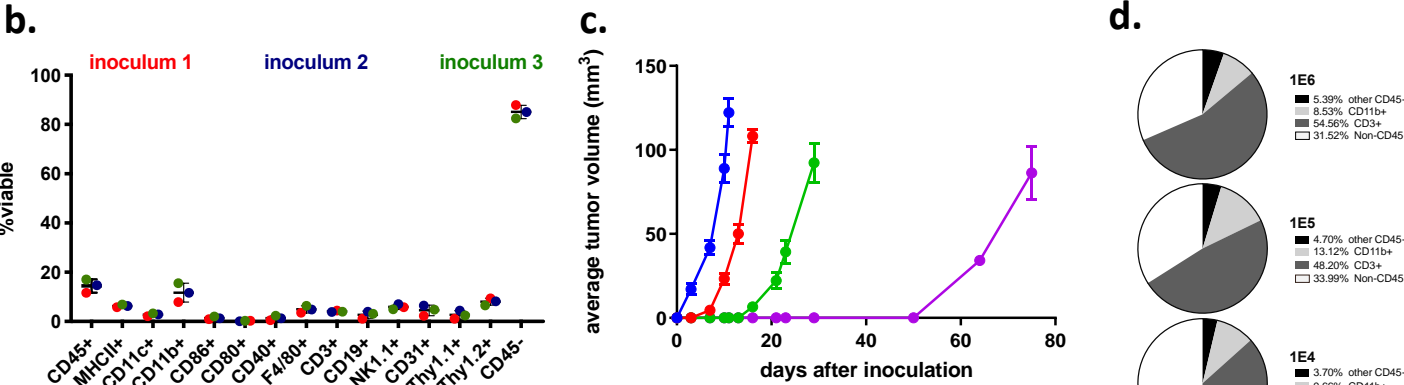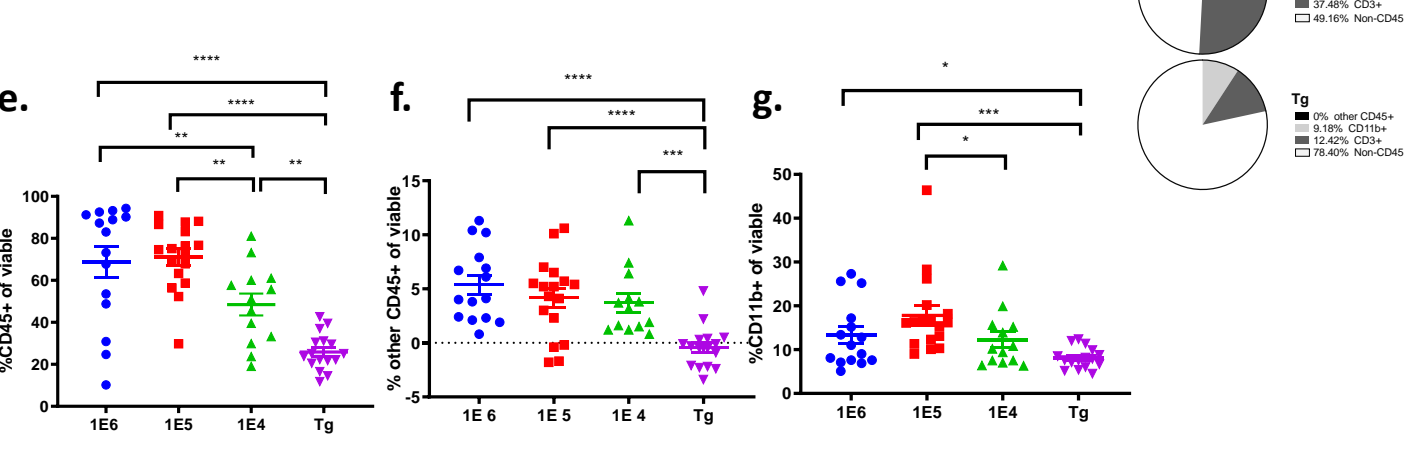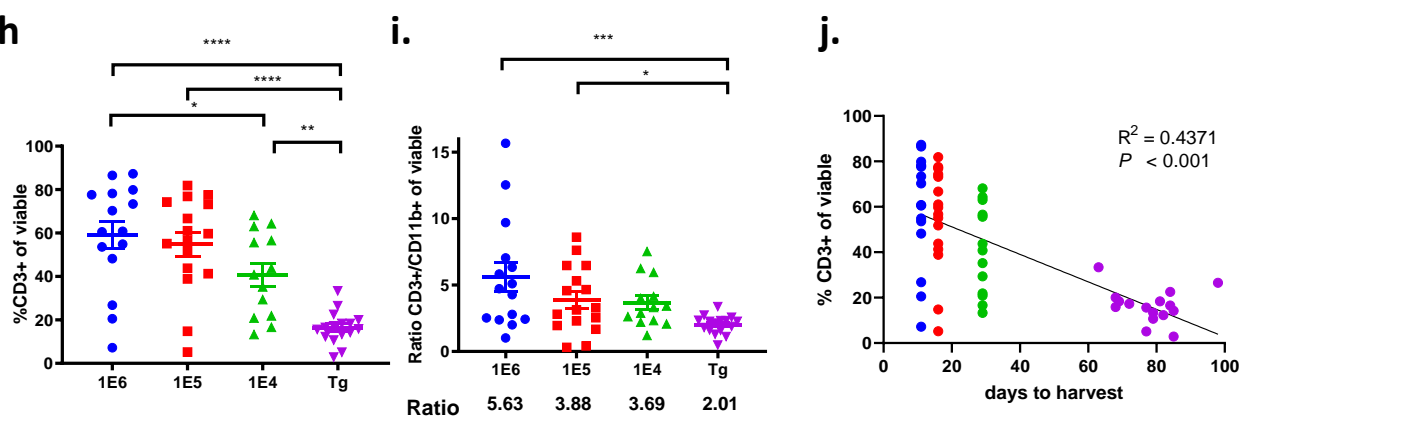

● 1E6    ■ 1E5    ▲ 1E4    ▼ Transgenic (Tg)

Lal et al. Figure 2. Tumor infiltrating leukocyte populations differ significantly in the different versions of the MMTV-PyMT breast tumor model.

a.

T-cells: of total (per gram of tumor tissue)

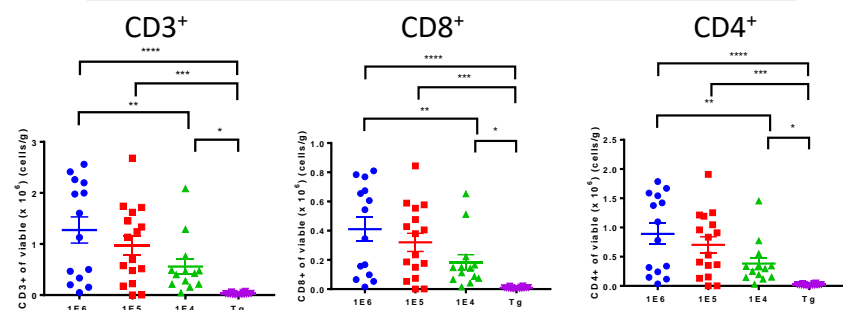

b.

T-cells: of CD45<sup>+</sup> cells

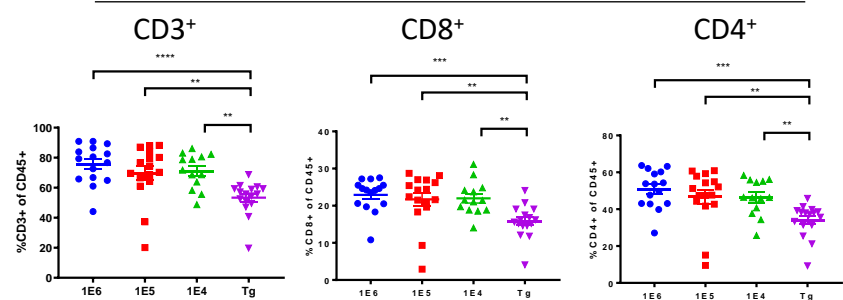

c.

Myeloid cells: of total (per gram of tumor tissue)

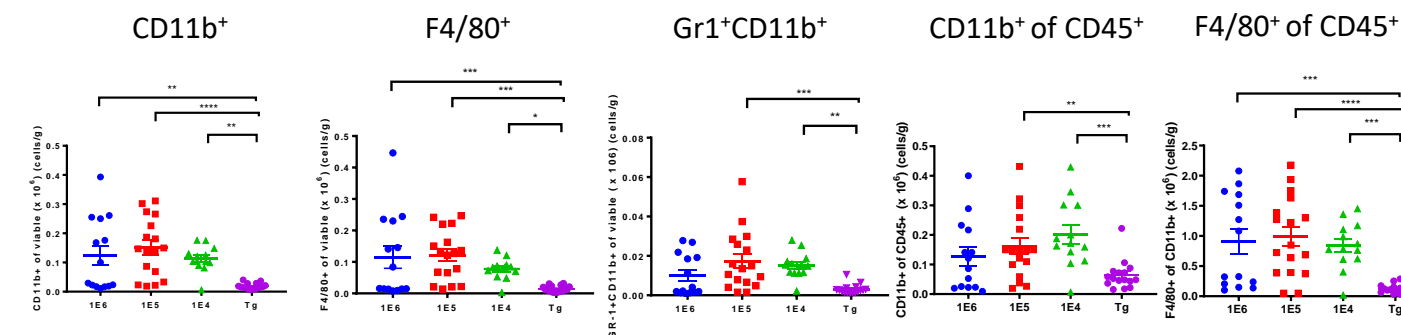

d.

Myeloid cells: of CD45<sup>+</sup> cells

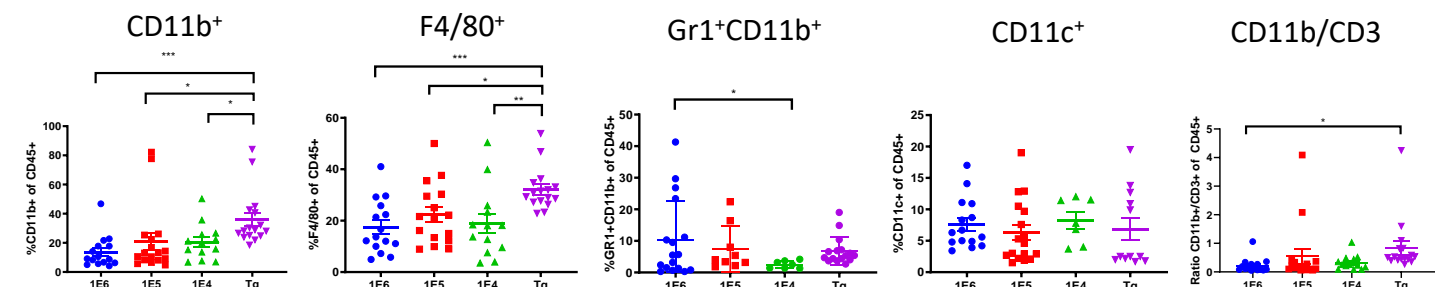

e.

● 1E6    ■ 1E5    ▲ 1E4    ▼ Transgenic (Tg)

Lal et. al. Figure 3. T-cell immune subsets differ significantly between the different versions of the MMTV-PyMT breast tumor model.

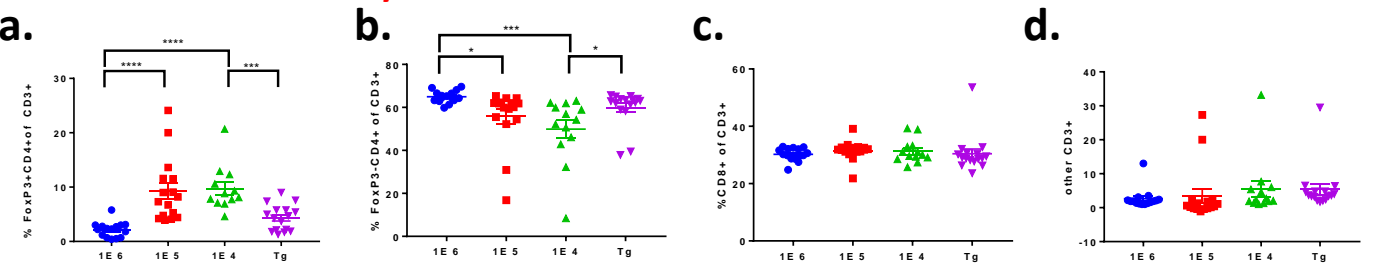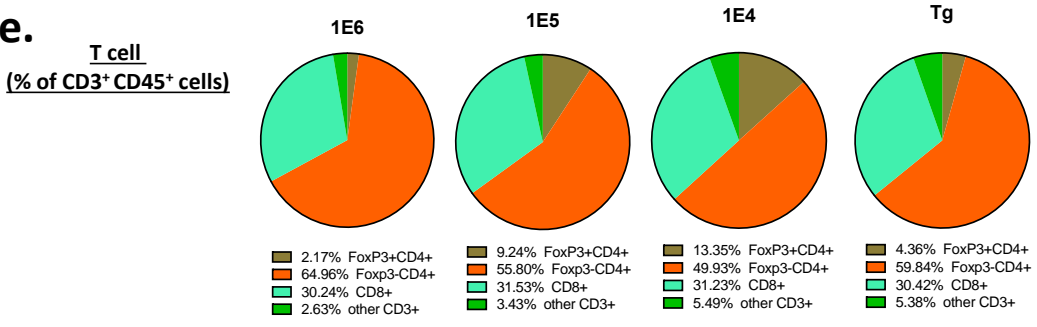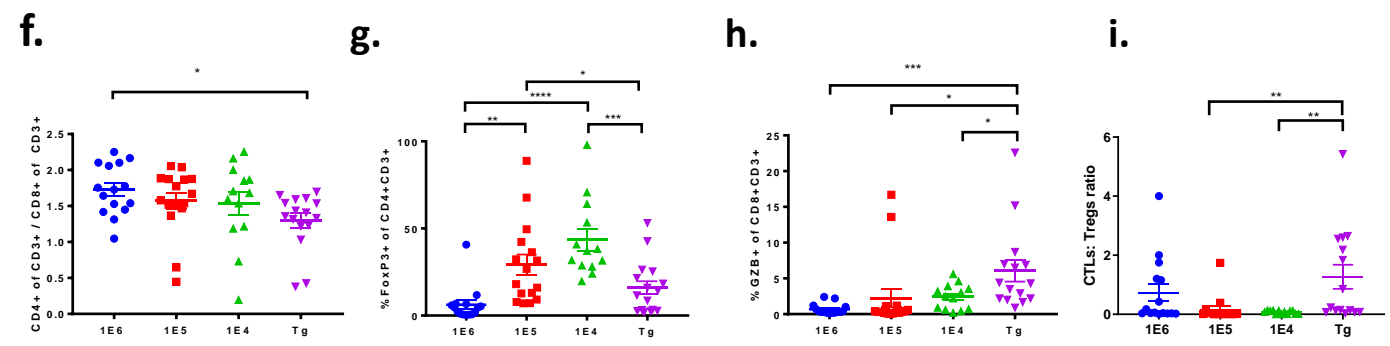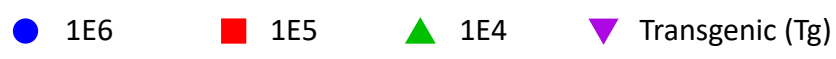

Lal et. al. Figure 4. Myeloid immune cell subsets differ significantly in the **different versions of the MMTV-PyMT breast tumor models.**

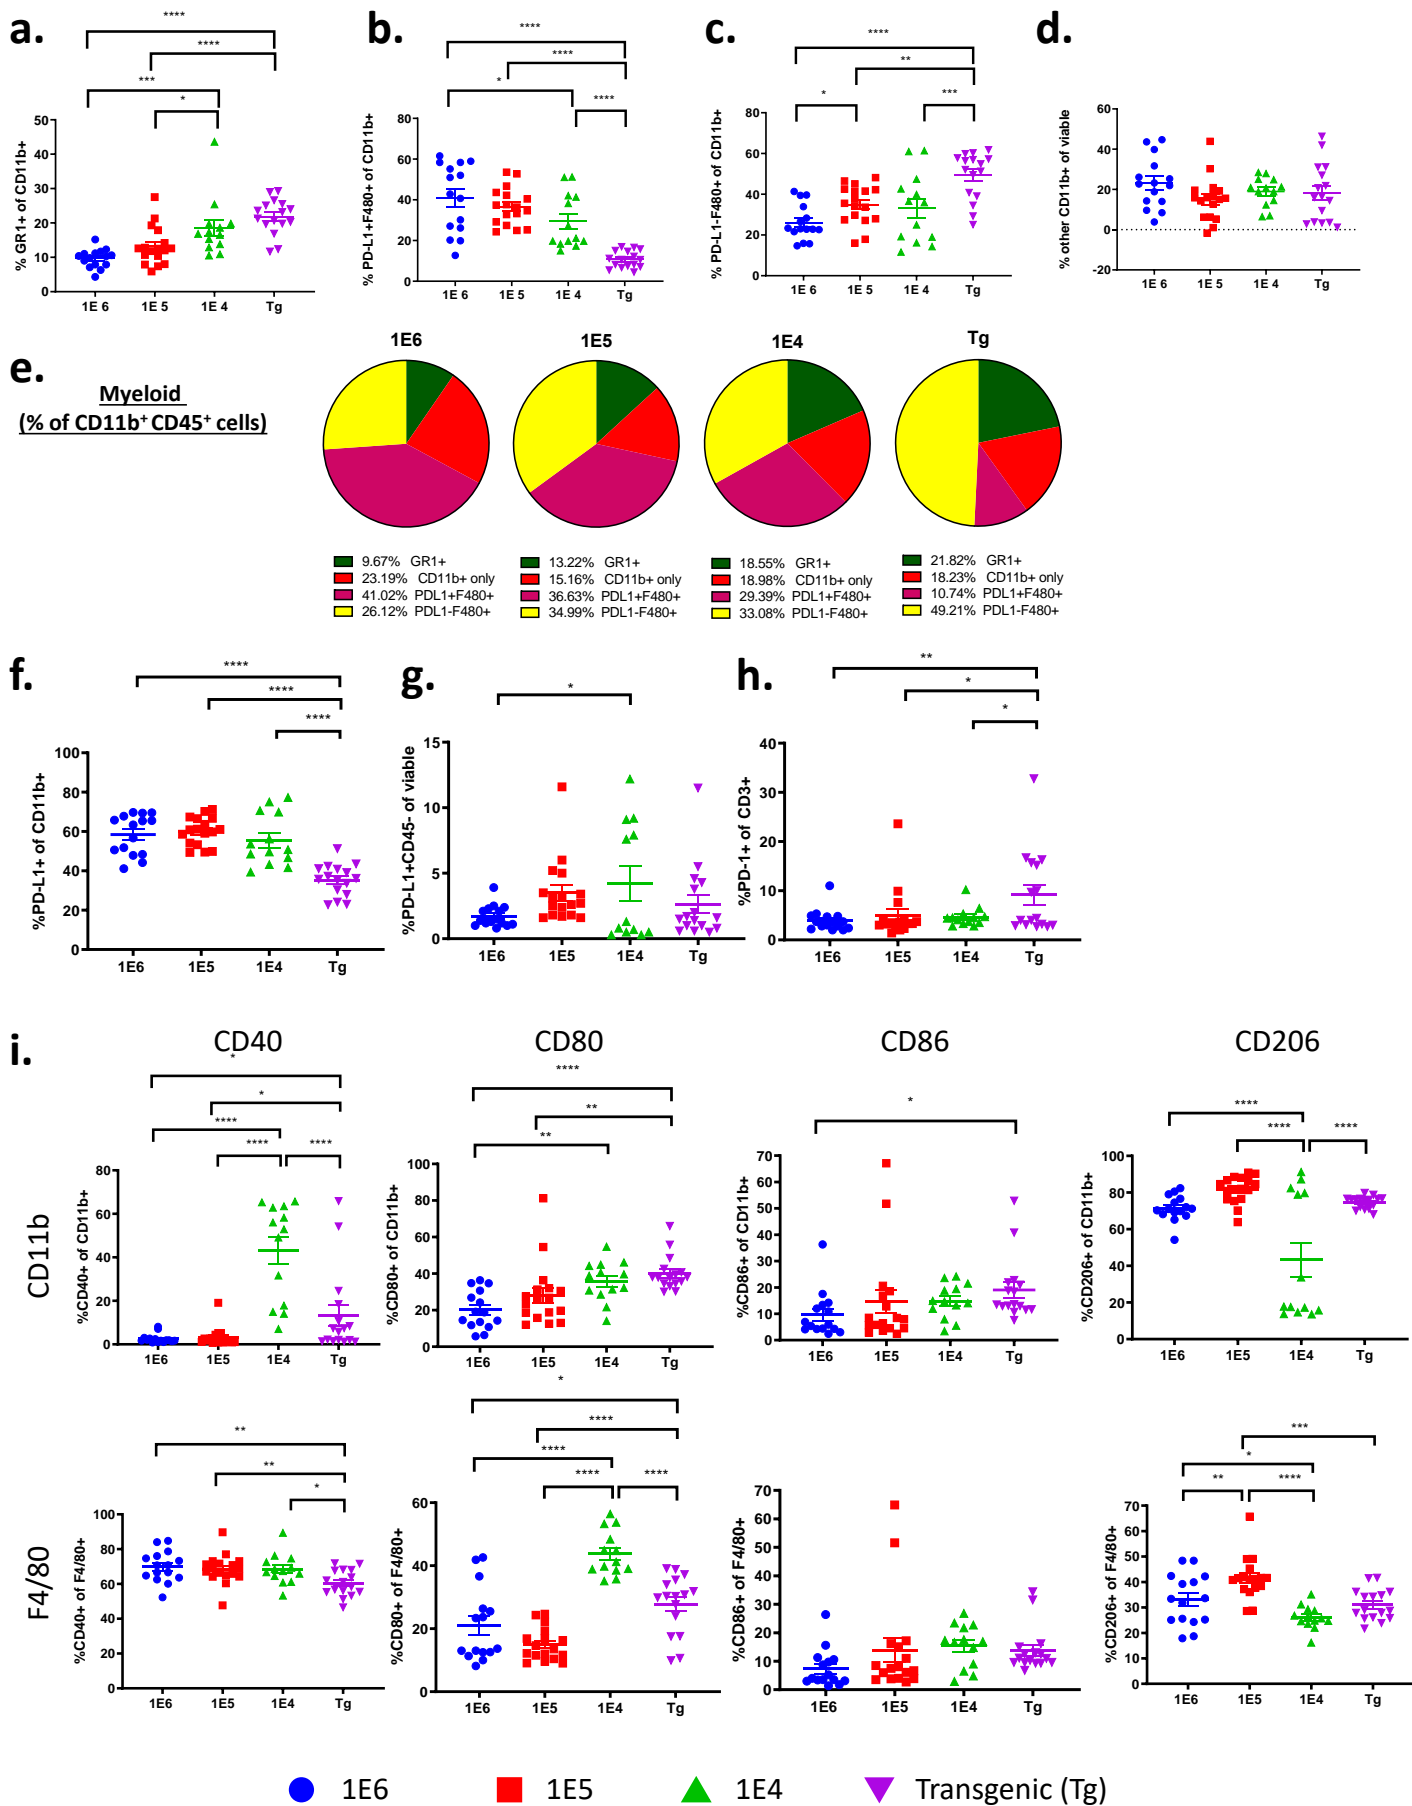

Lal et. al. Figure 5. The **different versions of the MMTV-PyMT breast tumor models** have **distinct immune transcriptional signatures**.

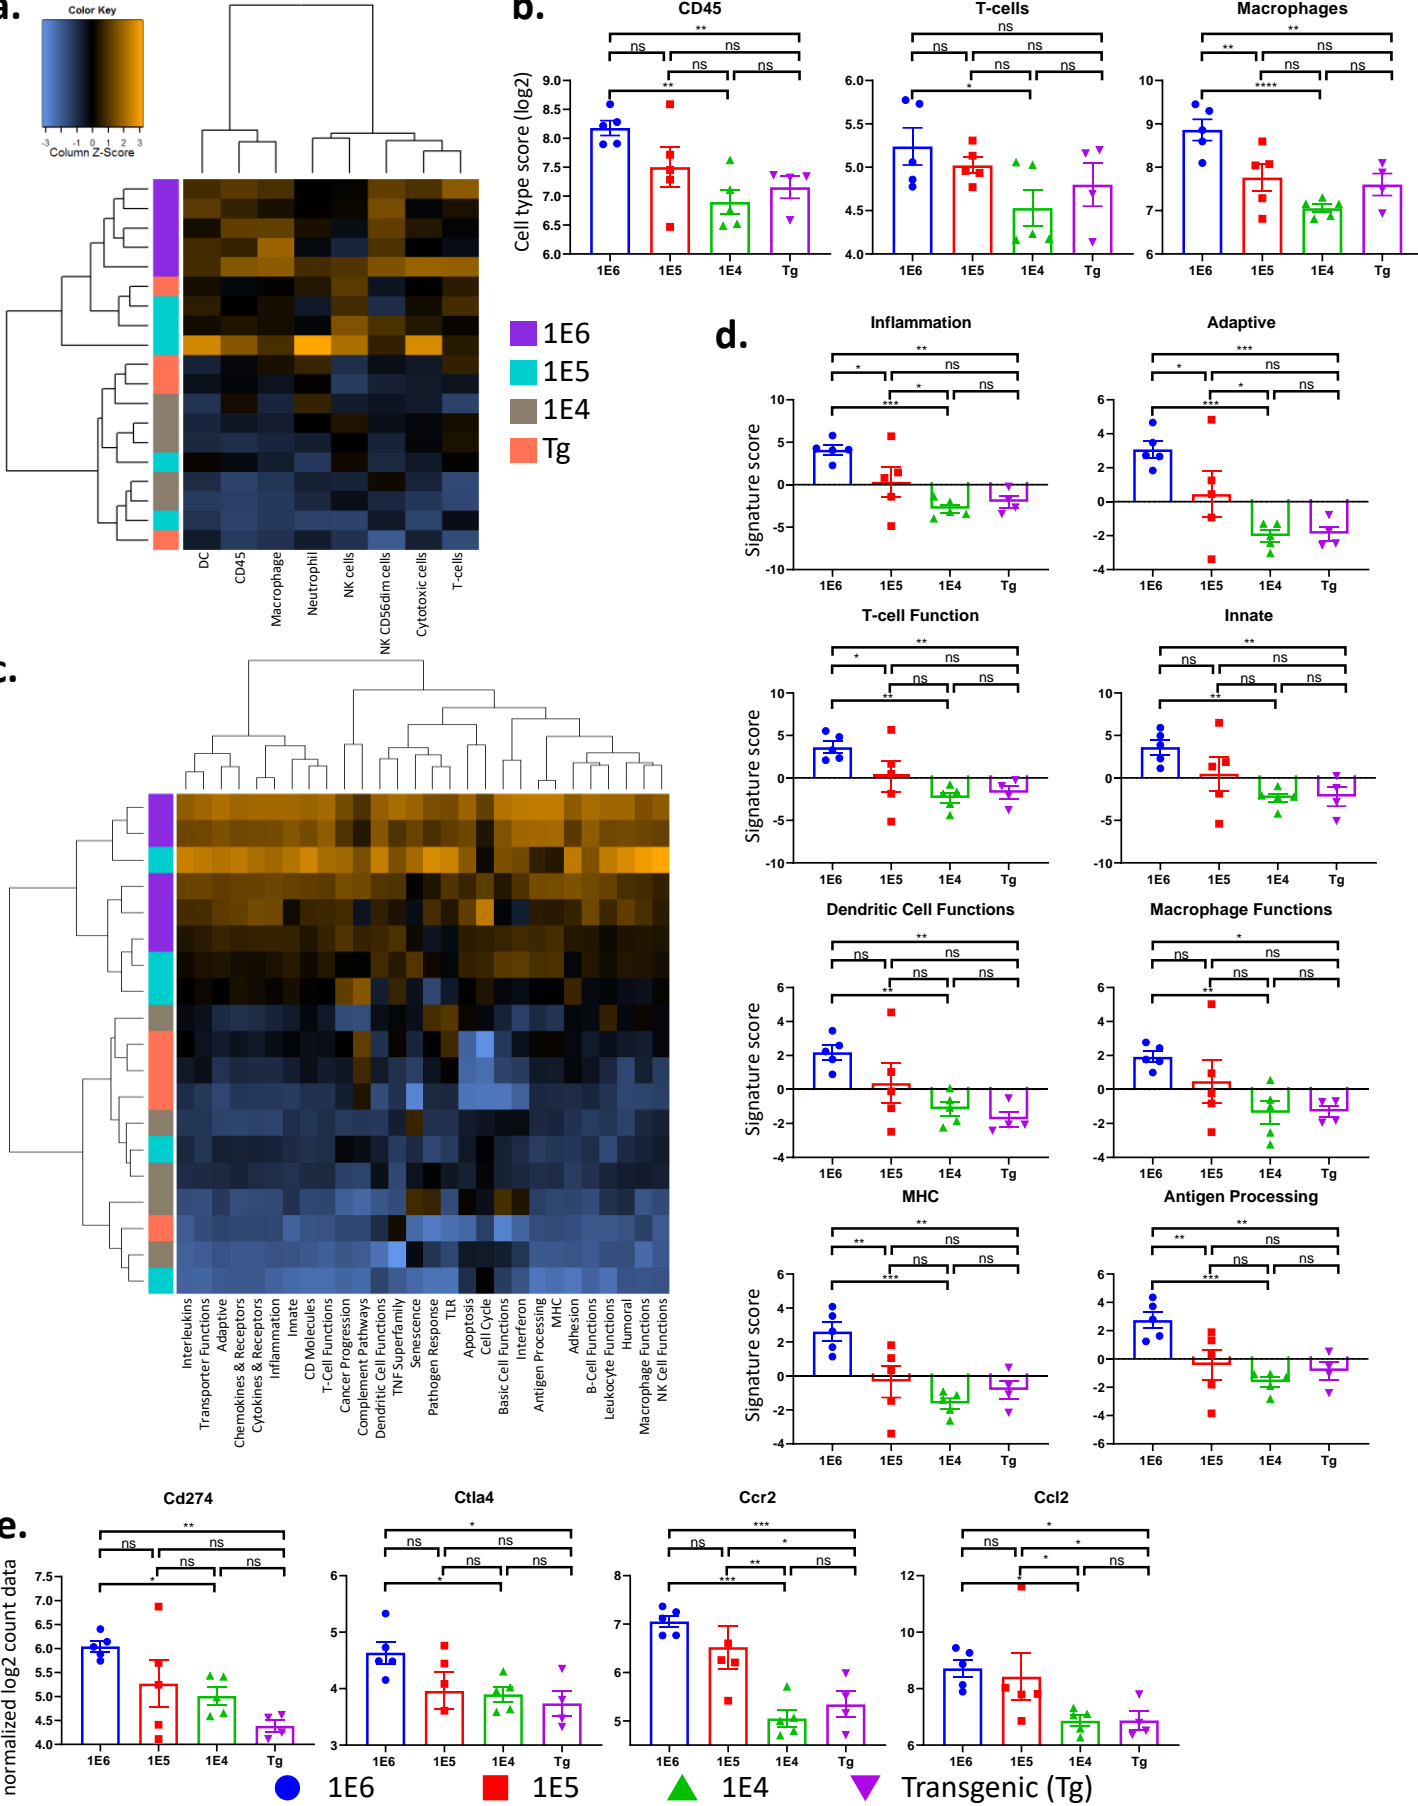

Lal et al. Figure 6. The **different versions of the** MMTV-PyMT syngeneic model respond differently to immune checkpoint blockade.

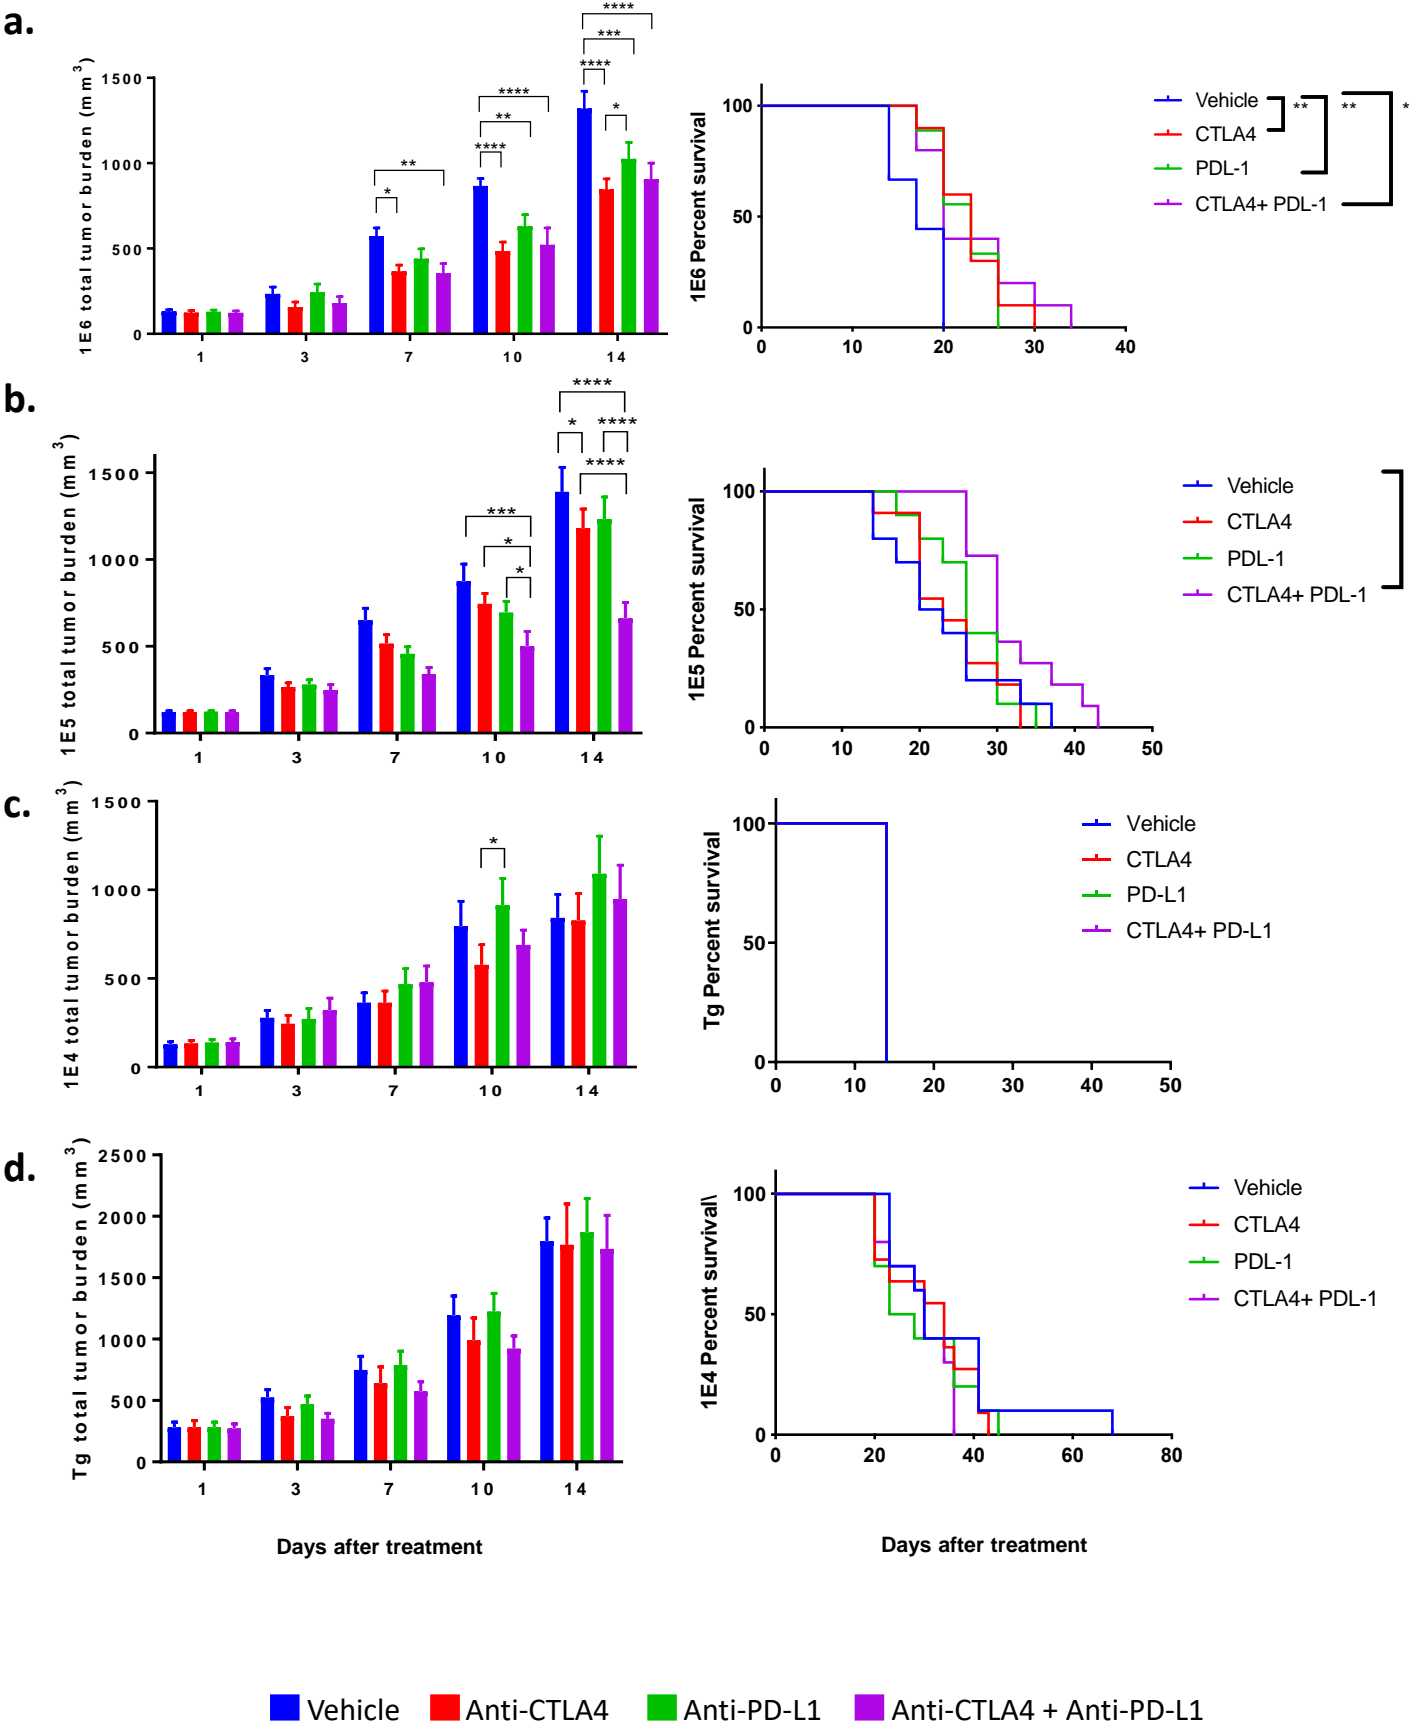

Lal et al. Figure 7. Testing tumor growth kinetics and immunotherapy response in immunodeficient and EMT6 murine models.

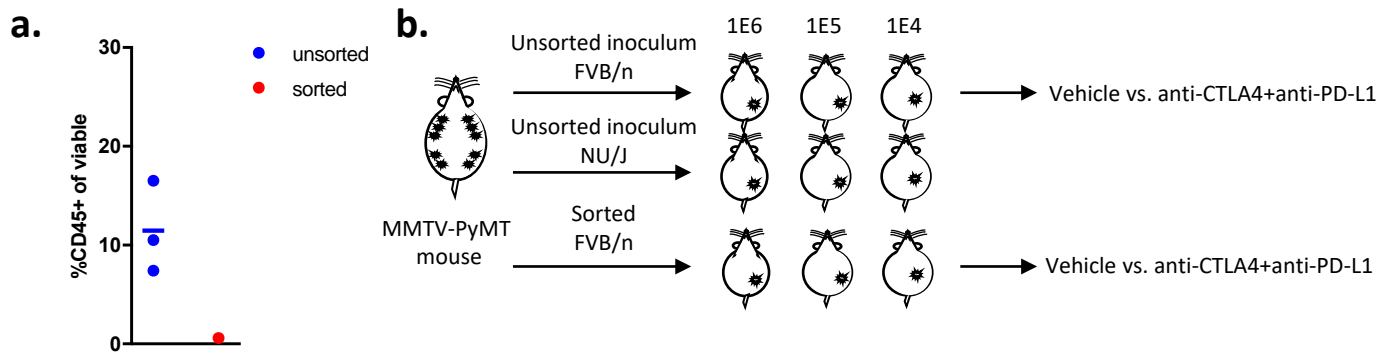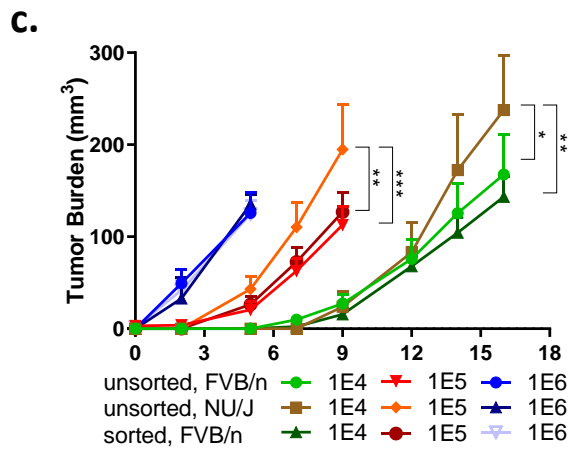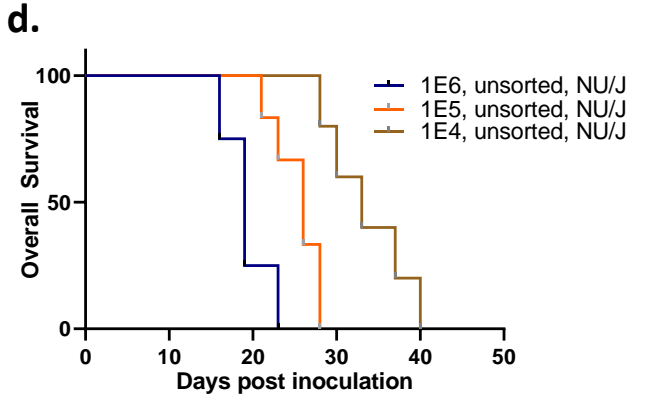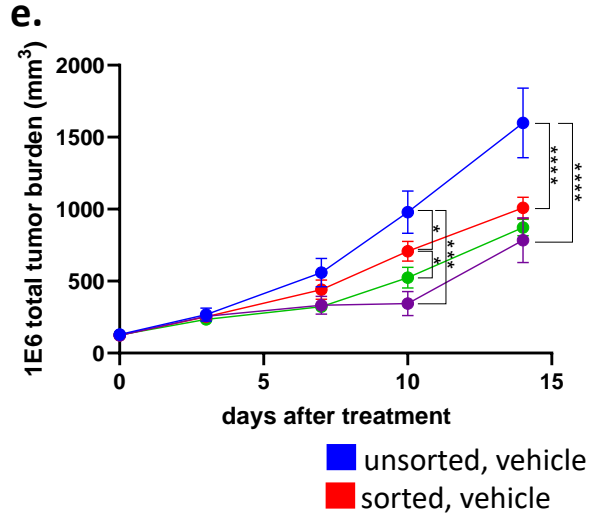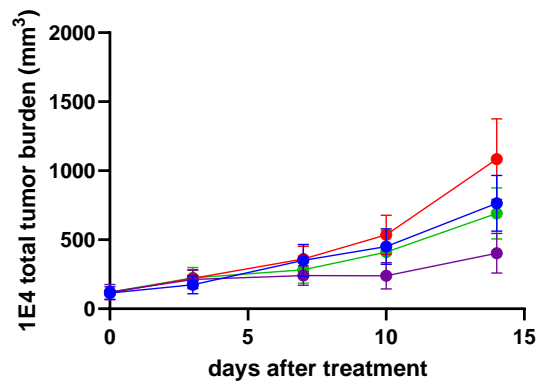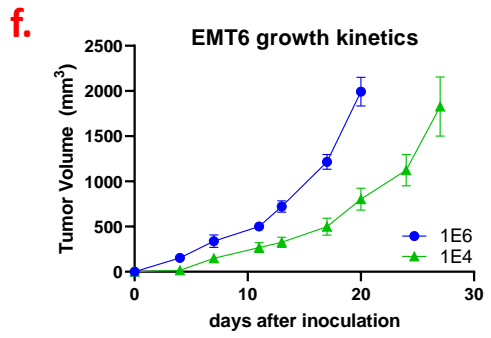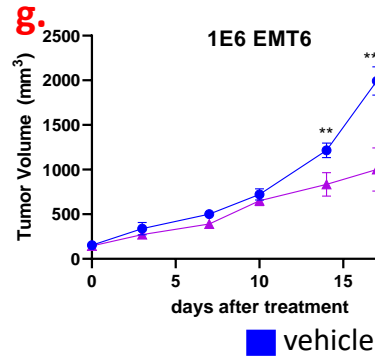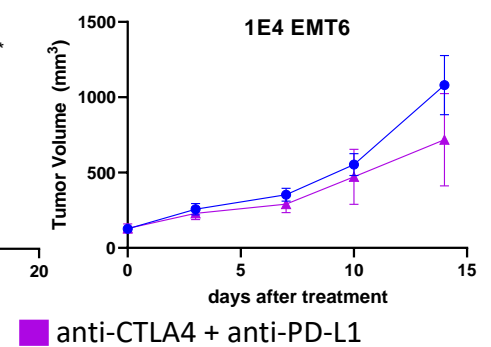

Lal et. al. Supplemental Figure 1. Immunophenotyping of cells used for generation of syngeneic murine models.

a.

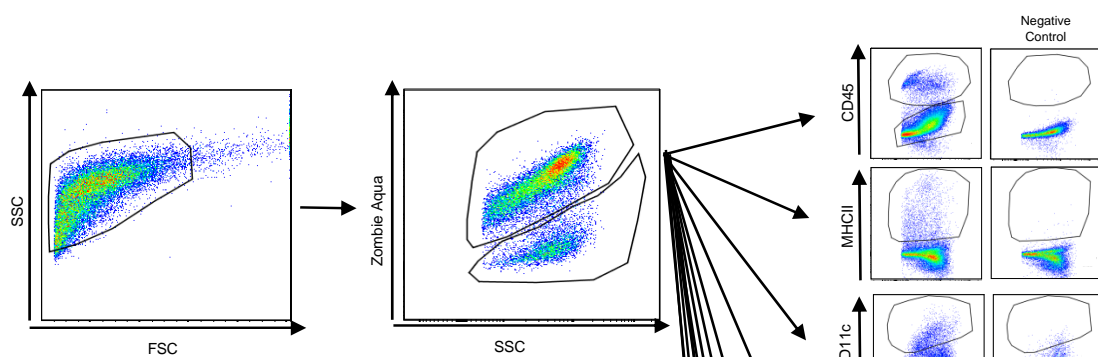

b.

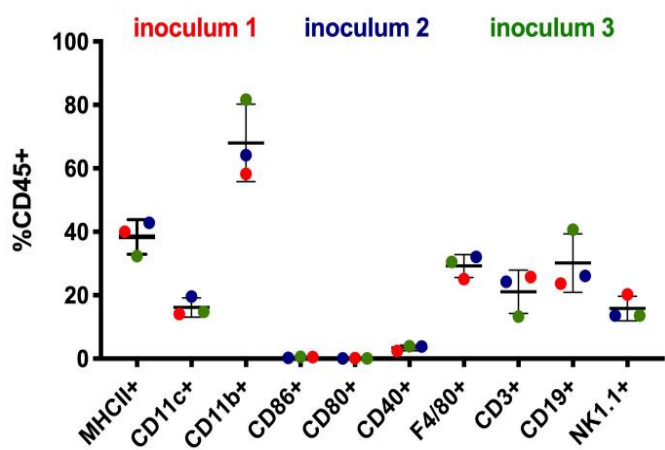

c.

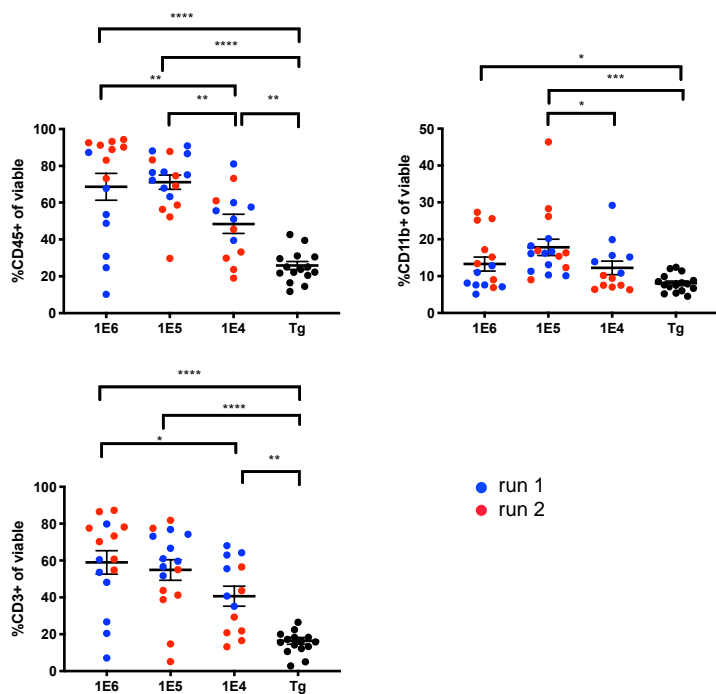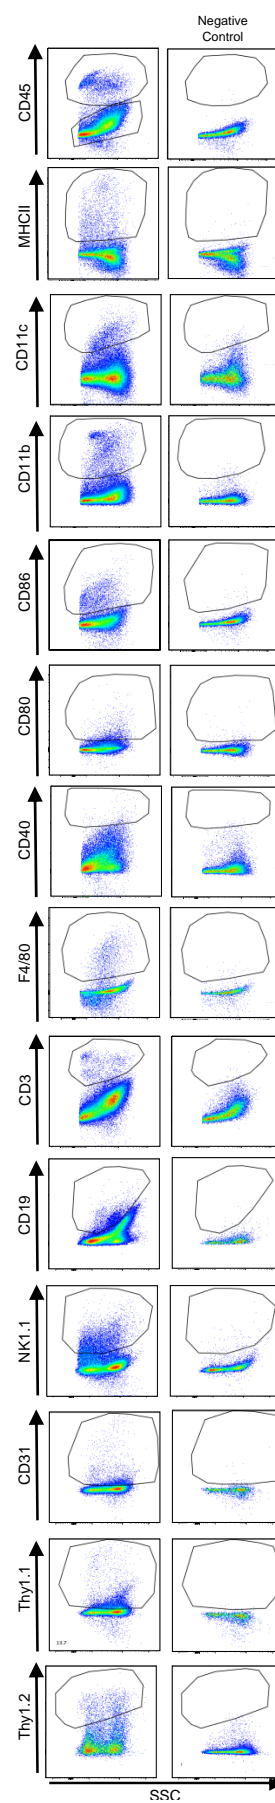



Lal et al. Supplemental Figure 2. Example of FACs gating strategy.

a.

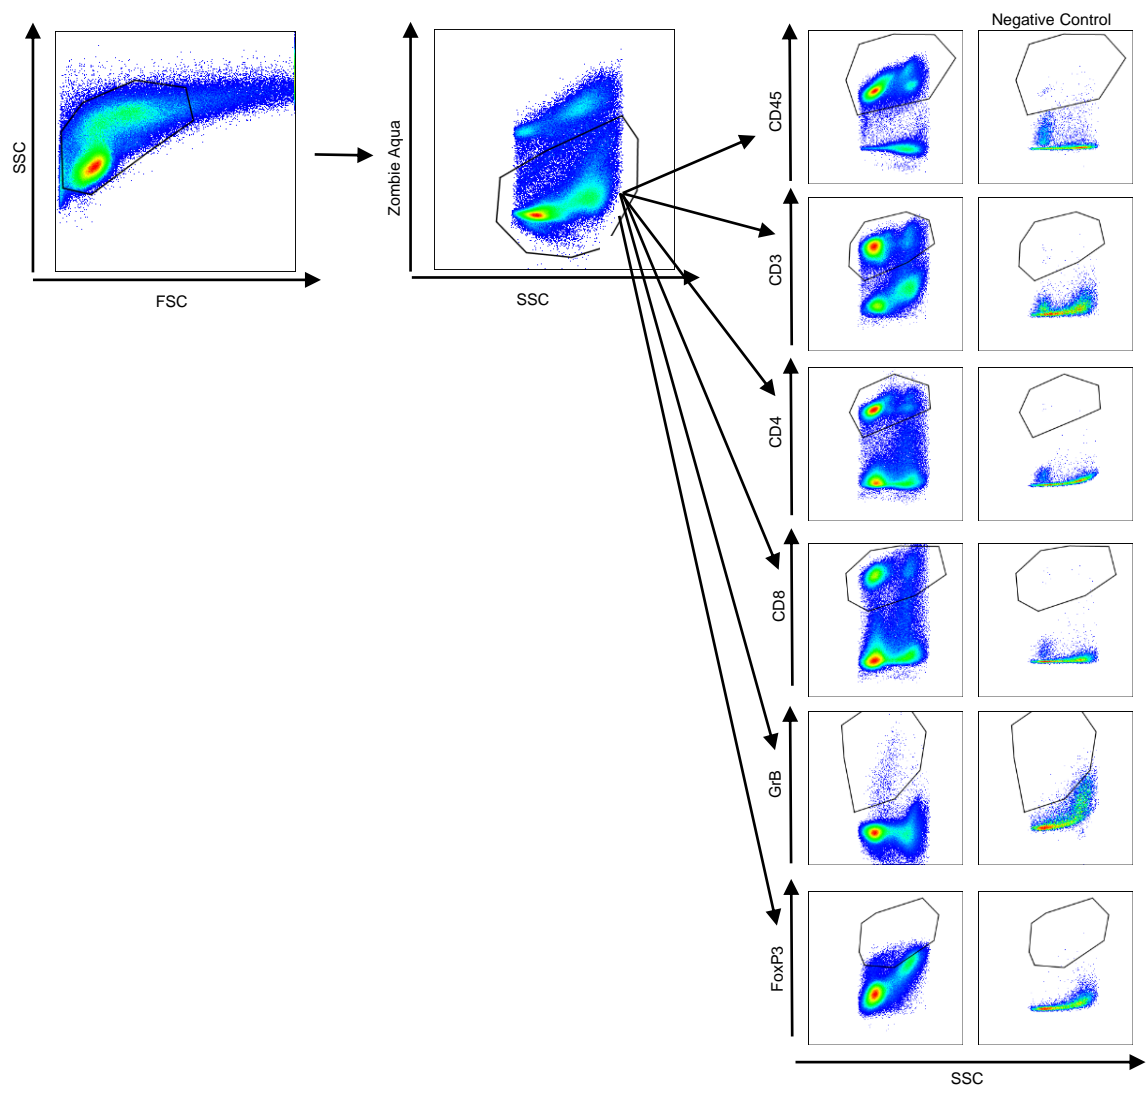

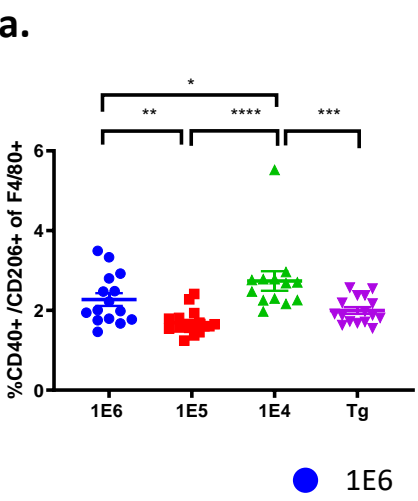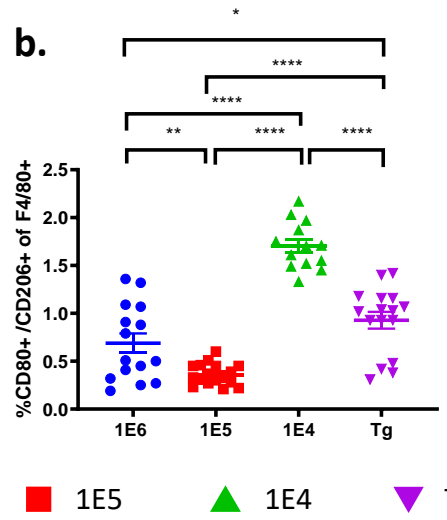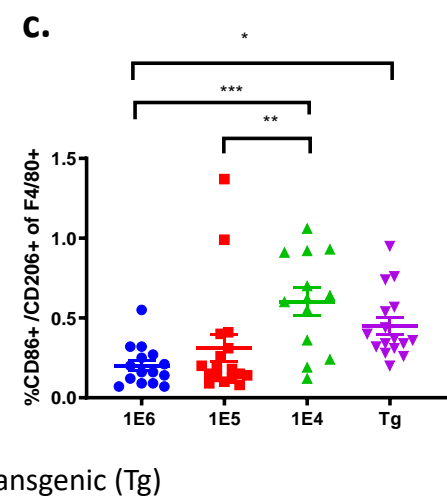

Lal et. al. Supplemental Figure 4. EMT6 1E6 and 1E4 models reproduce observations from the MMTV-PyMT syngeneic model.

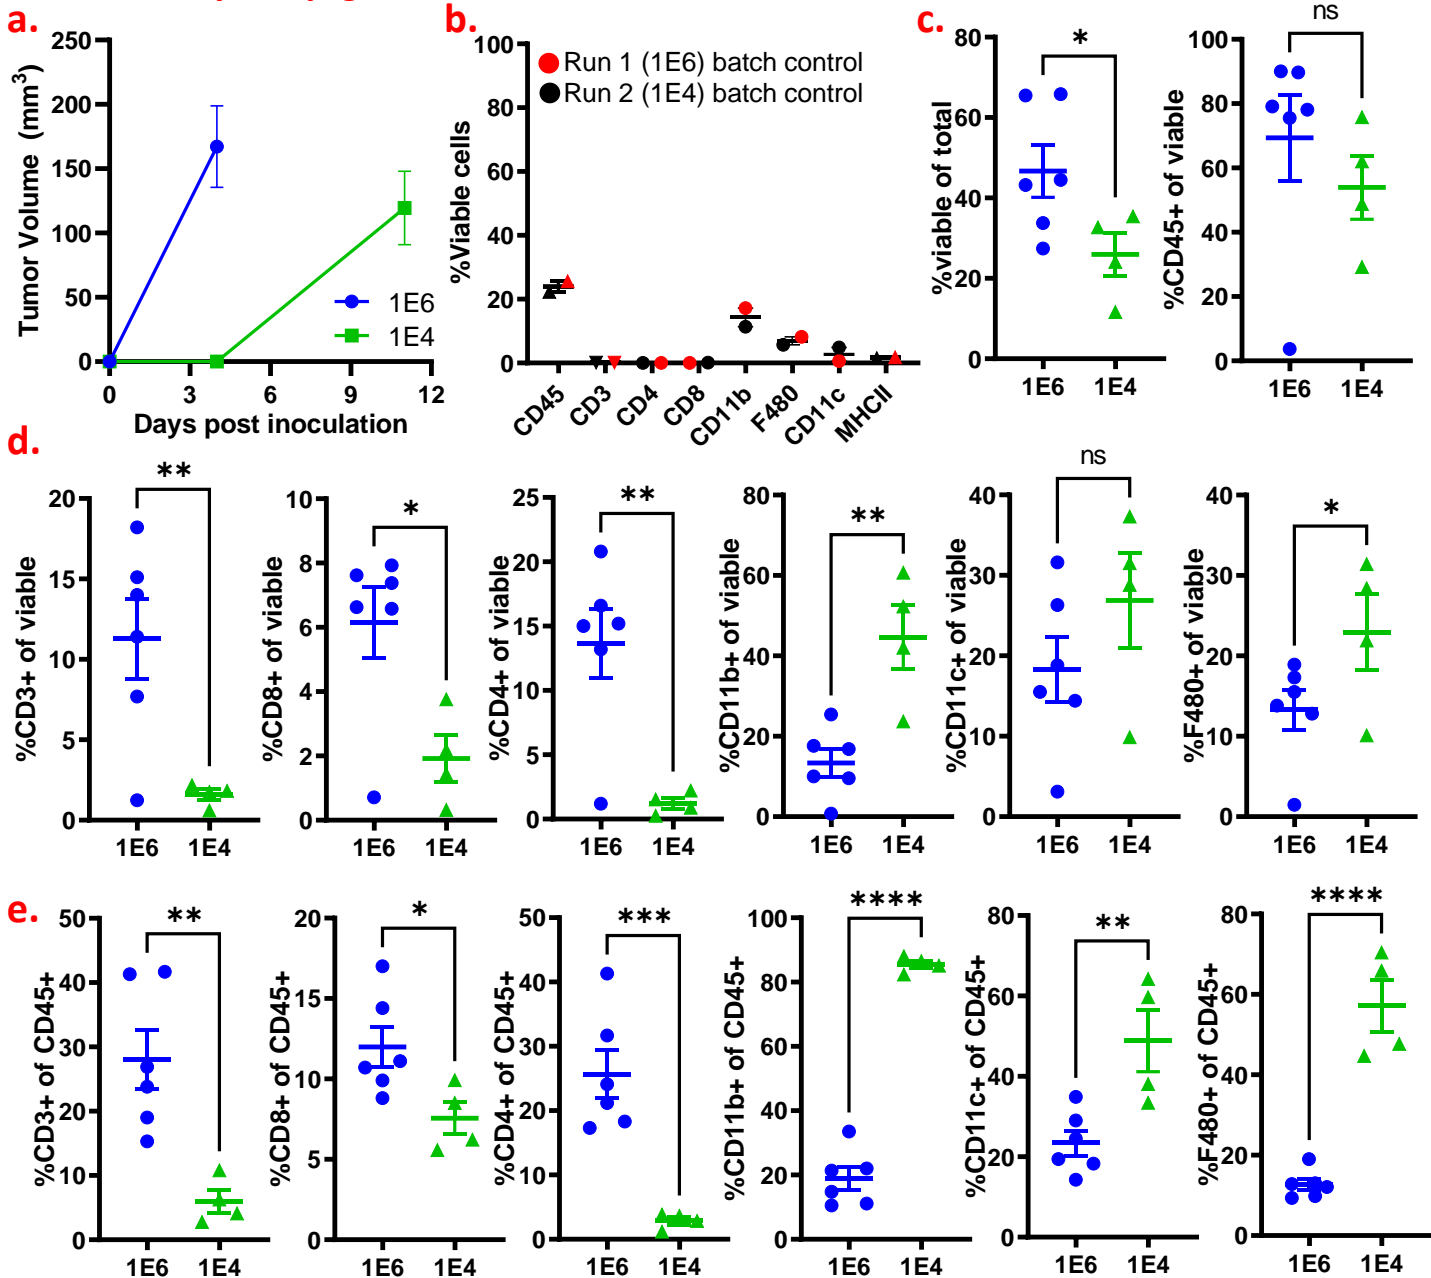

Lal et. al. Supplemental Figure 5. QC of mRNA expression analysis and cell type scores.

a.

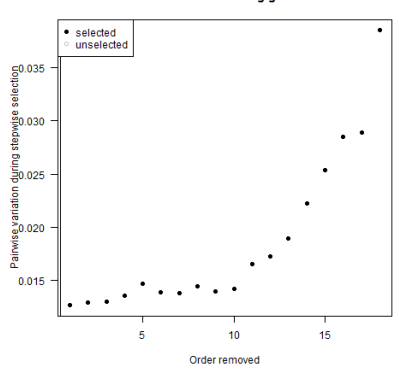

b.

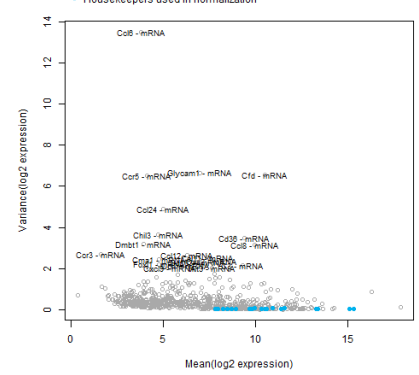

c.

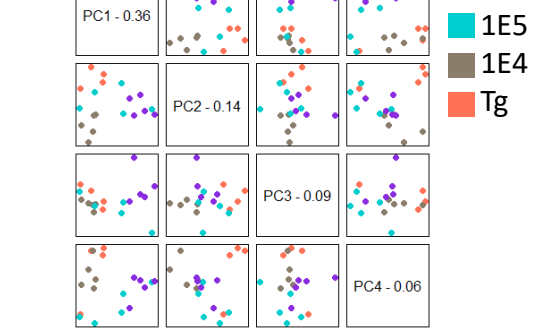

d.

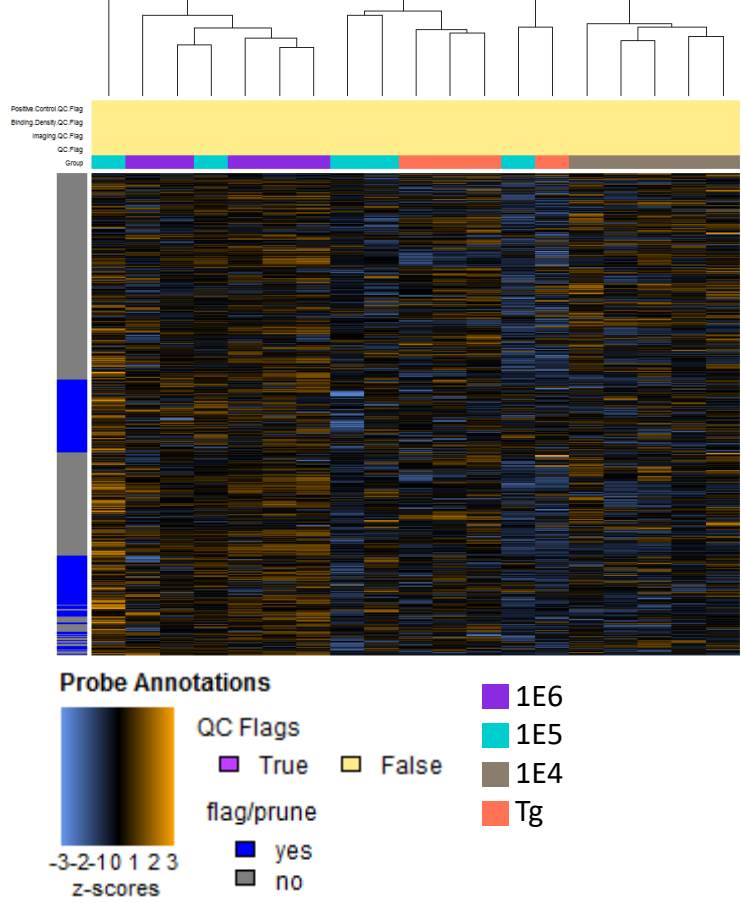

e.

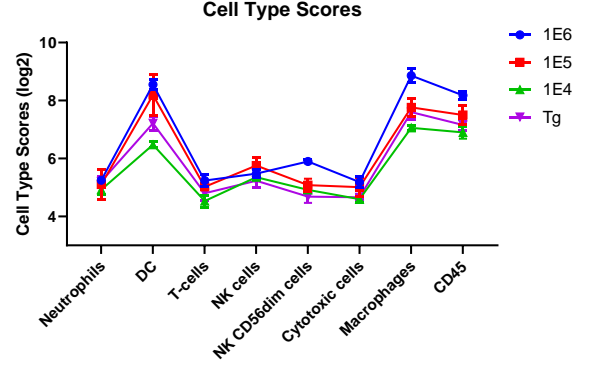

f.

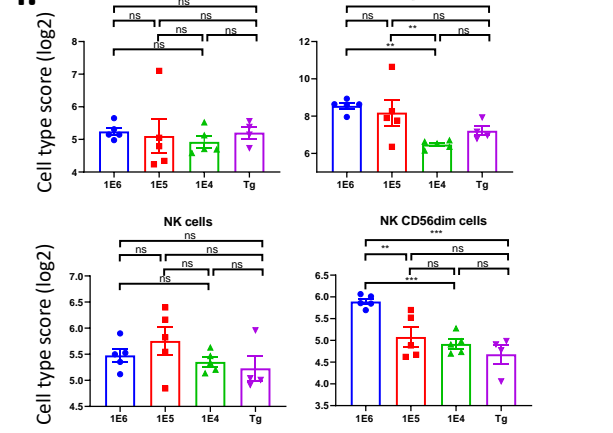

● 1E6      ■ 1E5      ▲ 1E4      ▼ Transgenic (Tg)

# Lal et. al. Supplemental Figure 6. Pathway analysis by Nanostring.

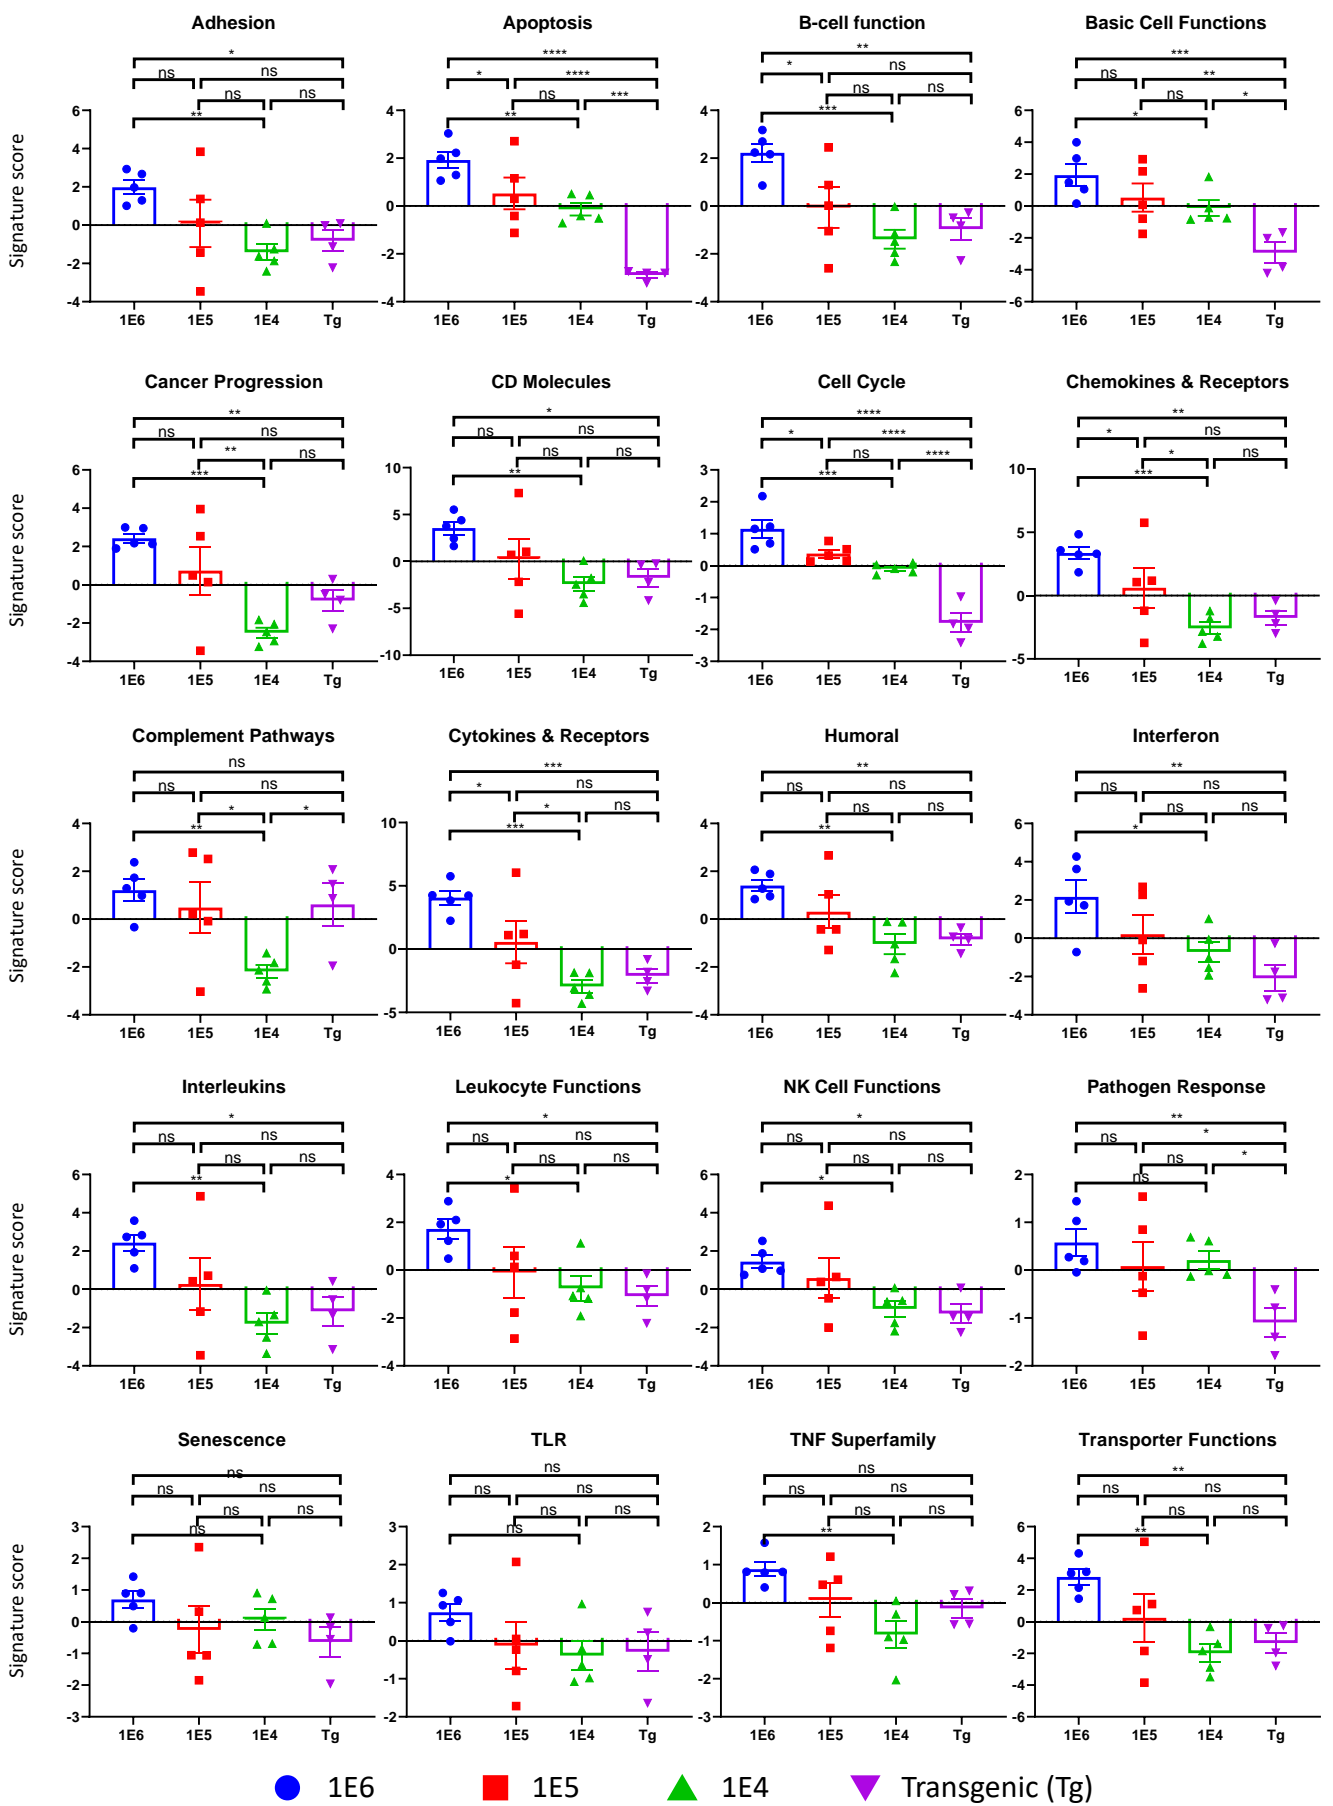

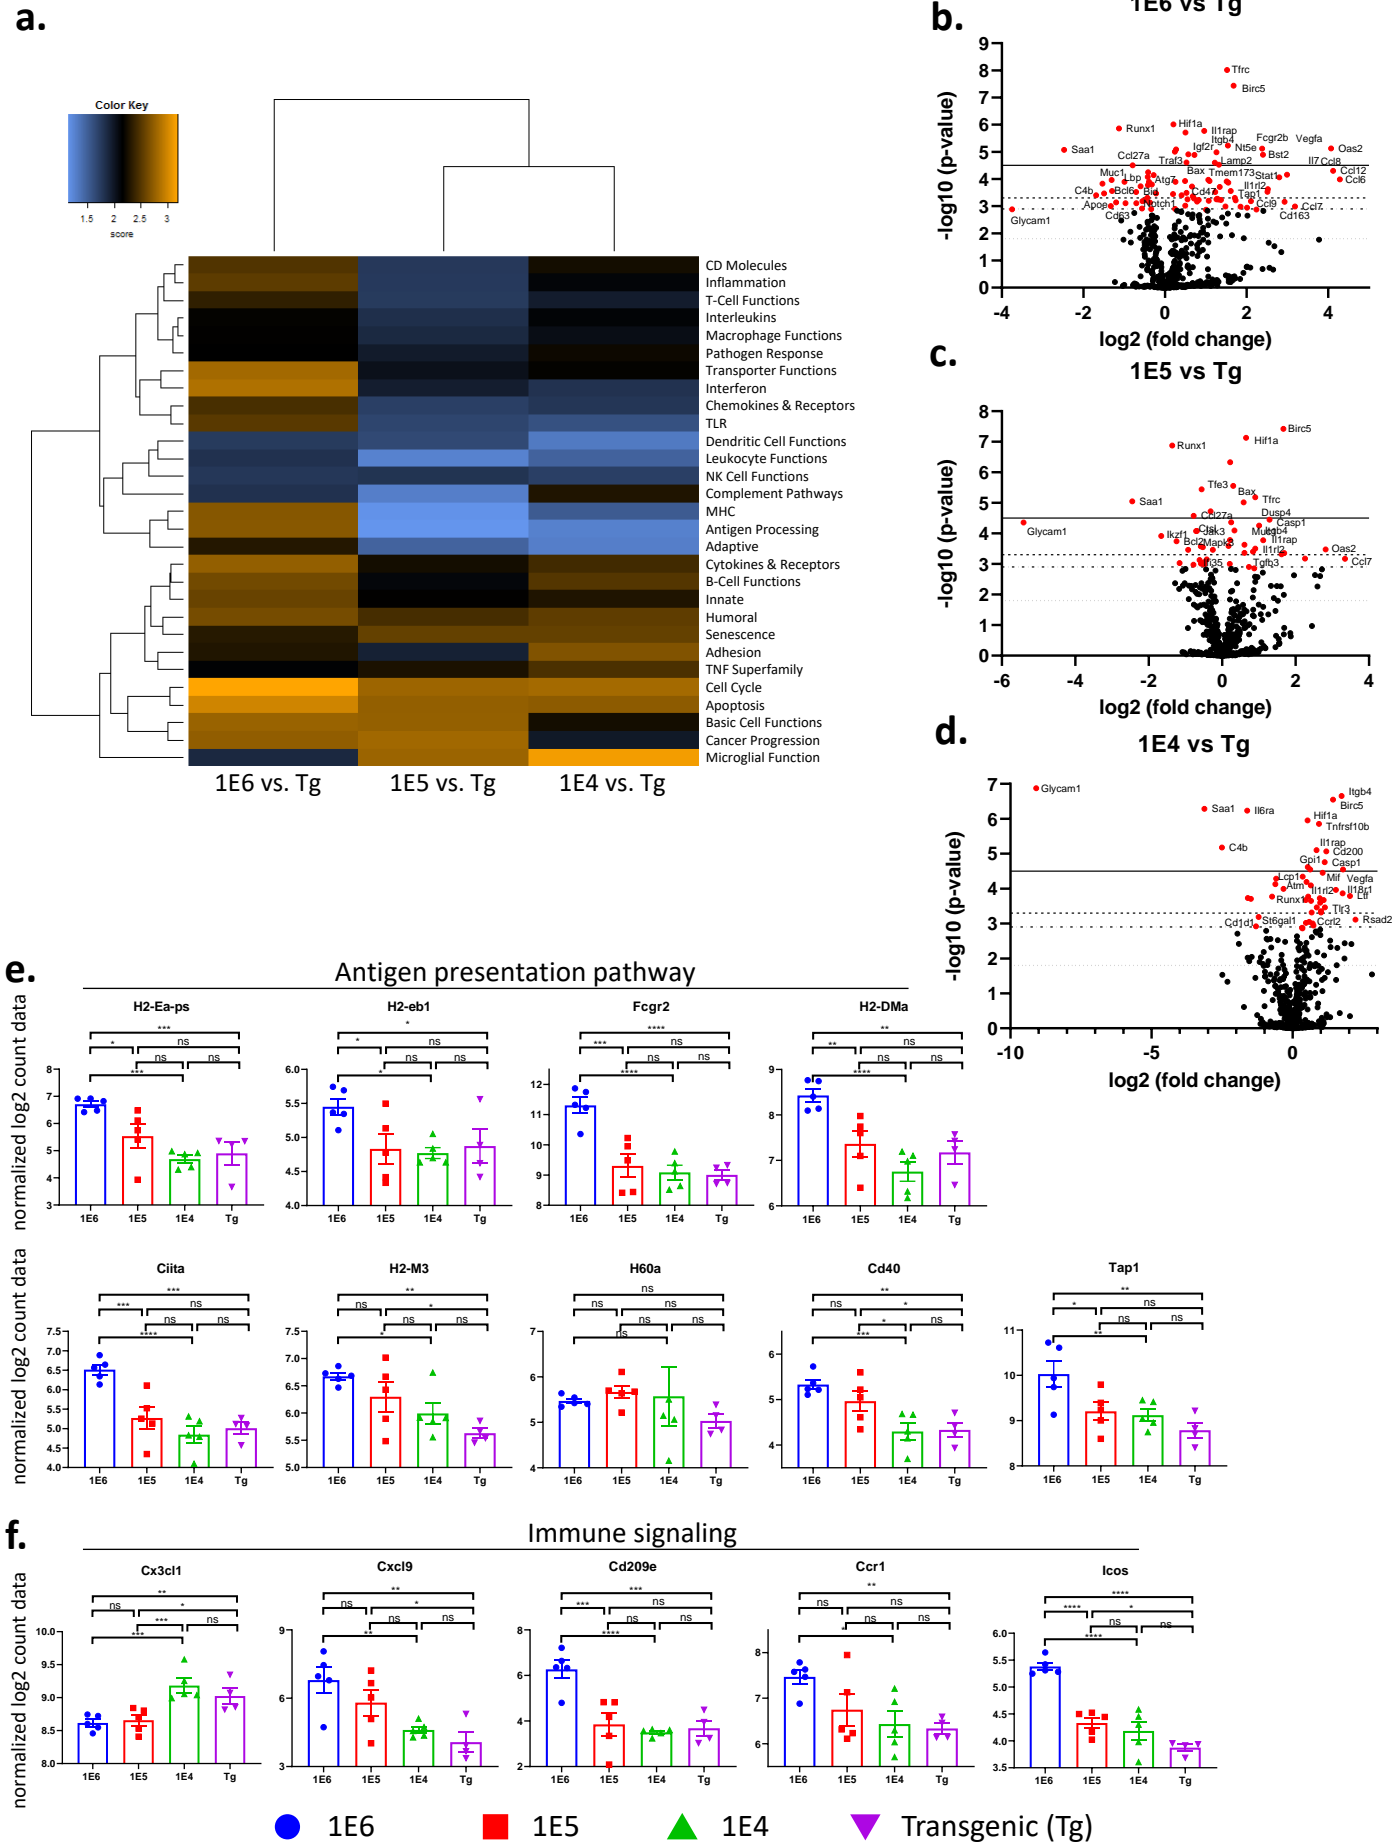

Lal et. al. Supplemental Figure 8. Syngeneic tumors treated with CTLA-4 and PD-L1 show significant differences in tumor responses.

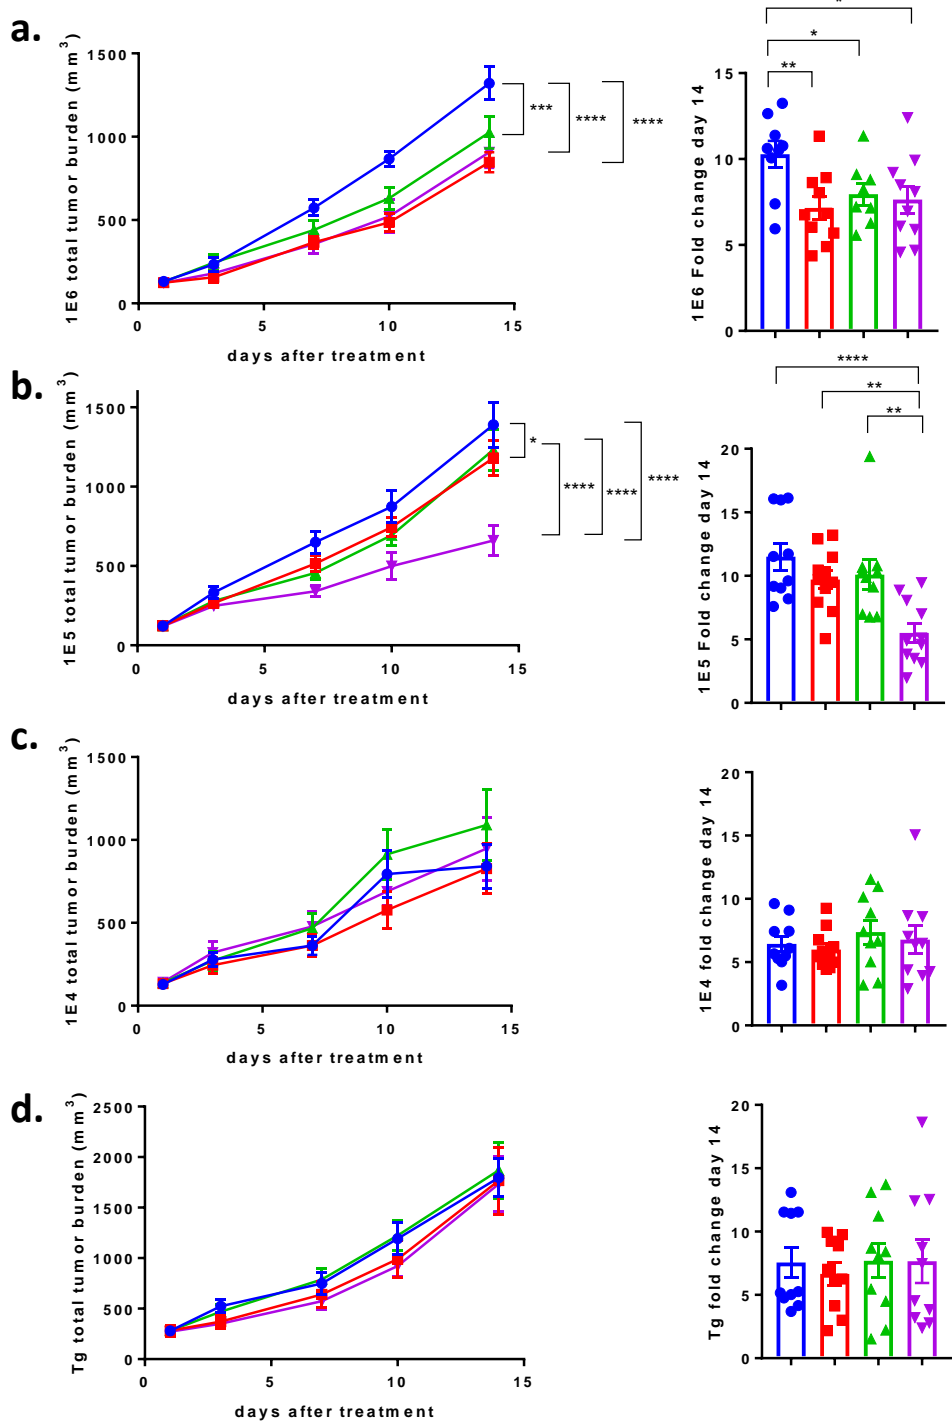

■ Vehicle   
 ■ Anti-CTLA4   
 ■ Anti-PD-L1   
 ■ Anti-CTLA4 + Anti-PD-L1

# Lal et. al. Supplemental Figure 9. Comparison of predicted responders vs. non-responders by NanoString analysis.

**a.**

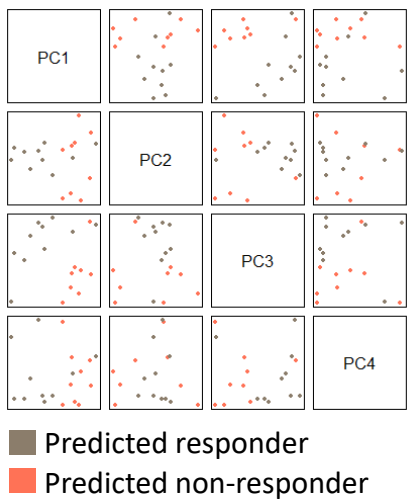

**b.**

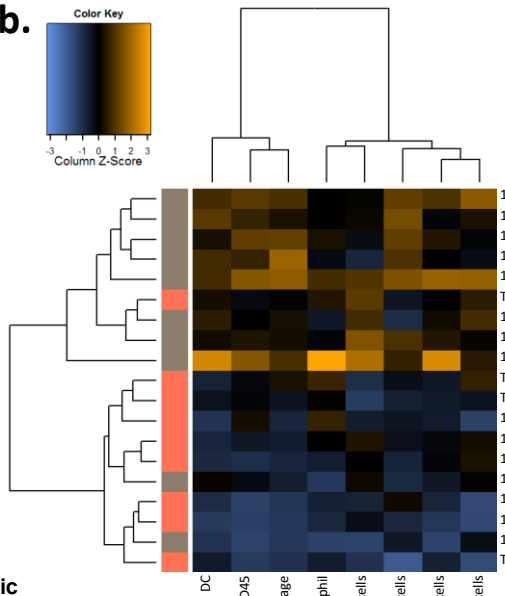

**c.**

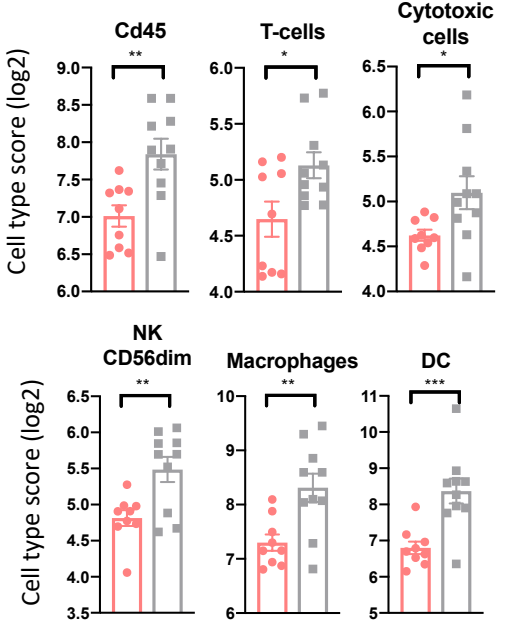

**d.**

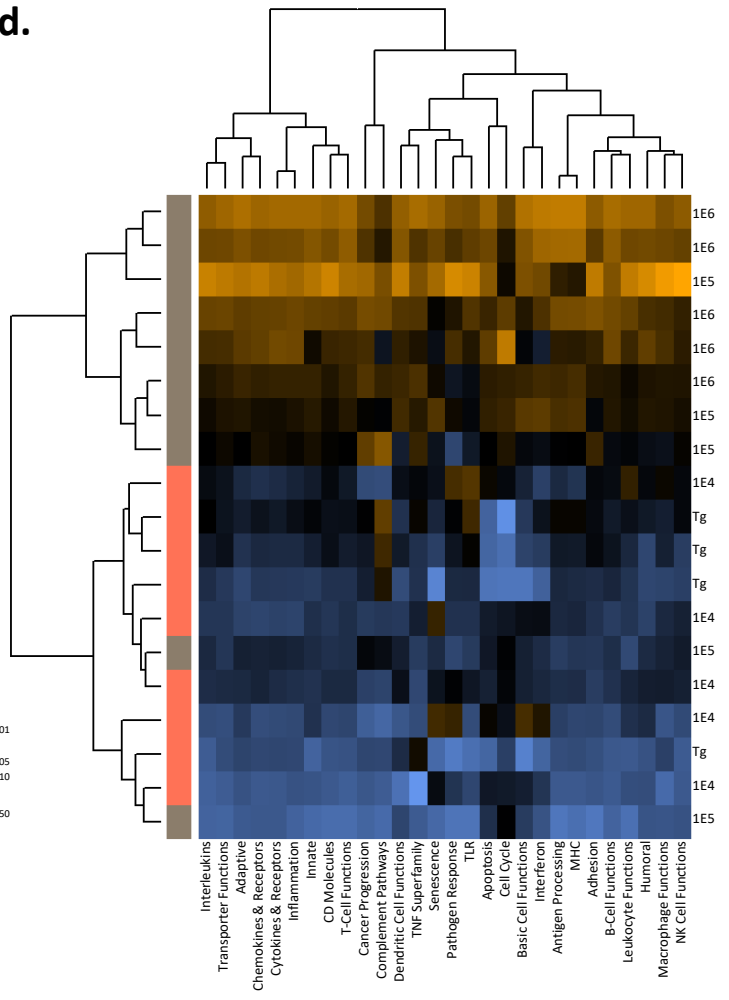

**e.**

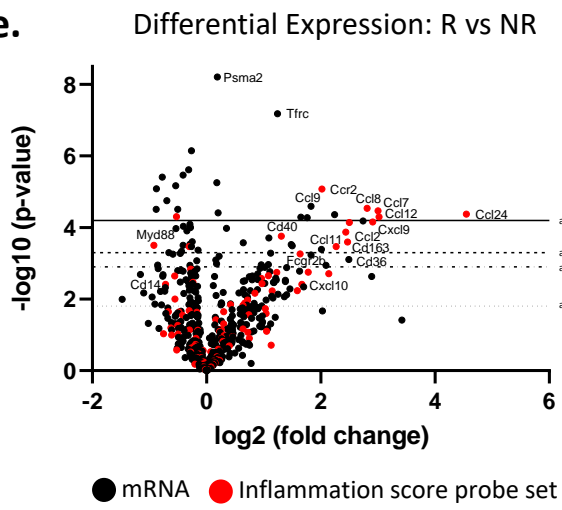



# Lal et al. Supplemental Figure 10. Summary Slide.

## a. T cells

|                                  | 1E6 | 1E5 | 1E4 |
|----------------------------------|-----|-----|-----|
| Tumor growth                     | +++ | ++  | +   |
| CD45+/Viable                     | +++ | ++  | +   |
| CD3+/viable                      | +++ | ++  | +   |
| CD8+/viable                      | +++ | ++  | +   |
| CD4+/viable                      | +++ | ++  | +   |
| CD11b+/viable                    | +   | +   | -   |
| Ratio: CD3+/CD11b of viable      | +   | +   | -   |
| CD3+/CD45+                       | ++  | ++  | ++  |
| CD8+/CD45+                       | +   | +   | +   |
| CD4+/CD45+                       | ++  | ++  | +   |
| Ratio: CD4+ of CD3+/CD8+ of CD3+ | +   | -   | -   |
| GrB+/CD8+CD45+                   | -   | +   | +   |
| FoxP3+/CD4+CD45+                 | +   | +   | +   |
| Ratio: CTLs/Tregs                | -   | +   | +   |
| PD-1+/CD3+                       | +   | +   | +   |

|   |                                       |
|---|---------------------------------------|
| + | Significant compared to MMTV-PyMT     |
| - | Not significant compared to MMTV-PyMT |
|   | Increase compared to MMTV-PyMT        |
|   | Decrease compared to MMTV-PyMT        |

## Myeloid Cells

|                          | 1E6 | 1E5 | 1E4 |
|--------------------------|-----|-----|-----|
| CD11b+/CD45+             | +   | +   | +   |
| F480+/CD45+              | +   | +   | +   |
| Gr1+CD11b+/CD45+         | -   | -   | -   |
| CD11c+/CD45+             | -   | -   | -   |
| Gr1+/CD11b+              | +   | +   | -   |
| PD-L1+F480+/CD11b+       | ++  | ++  | +   |
| PD-L1+/CD11b+            | +   | +   | +   |
| PD-L1-F480+/CD11b+       | +   | +   | +   |
| PD-L1+CD45-/Viable       | -   | -   | -   |
| CD40+/CD11b+             | +   | +   | +   |
| CD80+/CD11b+             | +   | +   | -   |
| CD86+/CD11b+             | +   | -   | -   |
| CD206+/CD11b+            | -   | -   | +   |
| CD40+/F480b+             | +   | +   | +   |
| CD80+/F480+              | +   | +   | +   |
| CD86+/F480+              | -   | -   | -   |
| CD206+/F480+             | -   | +   | -   |
| Ratio: M1/M2 macrophages | +   | +   | +   |
| Antigen processing/MHC   | ++  | -   | -   |
| CD11b+/CD3+ of CD45      | +   | -   | -   |

## ICB Efficacy

|                                    | 1E6 | 1E5 | 1E4 | Tg |
|------------------------------------|-----|-----|-----|----|
| CTLA-4 monotherapy                 | +   | +   | -   | -  |
| PD-L1 monotherapy                  | +   | -   | -   | -  |
| PD-L1 + CTLA-4 combination therapy | ++  | ++  | -   | -  |

|   |                                     |
|---|-------------------------------------|
| + | Significant compared to Vehicle     |
| - | Not significant compared to Vehicle |
|   | Increase compared to Vehicle        |
|   | Decrease compared to Vehicle        |

## b.

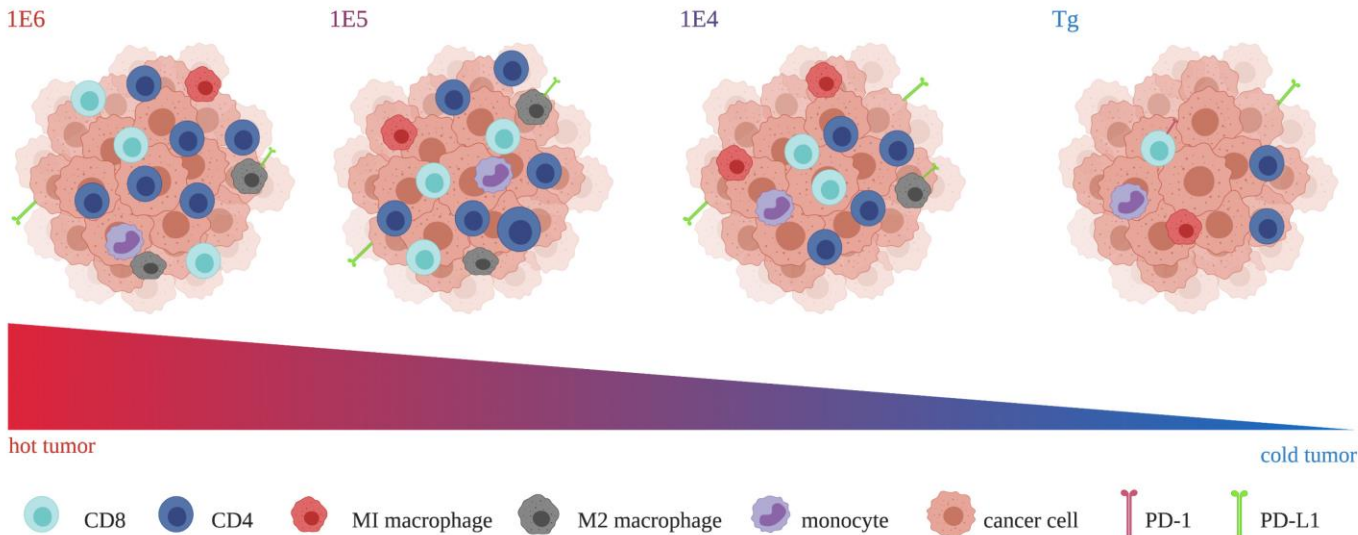

**Table 1. List of Top 20 differential expression of immune transcripts in 1E6 versus the autochthonous model.**

| Transcript  | Gene Sets                                                                                                  | probe.ID            | Log2 fold change | P-value  |
|-------------|------------------------------------------------------------------------------------------------------------|---------------------|------------------|----------|
| Tfrc-mRNA   | CD molecules, Transporter Functions                                                                        | NM_011638.3:1930    | 1.52             | 9.64E-09 |
| Birc5-mRNA  | Apoptosis, Cell Cycle, Cytokines & Receptors                                                               | NM_009689.2:237     | 1.68             | 3.66E-08 |
| Psm2-mRNA   | Cancer Progression                                                                                         | NM_008944.2:136     | 0.206            | 9.74E-07 |
| Runx1-mRNA  |                                                                                                            | NM_001111021.1:3055 | -1.13            | 1.38E-06 |
| Il1rap-mRNA | Cytokines & Receptors, Inflammation, Innate, Interleukins                                                  | NM_008364.2:2415    | 0.961            | 1.70E-06 |
| Hif1a-mRNA  | Apoptosis, Cancer Progression                                                                              | NM_010431.2:1294    | 0.503            | 1.94E-06 |
| Nt5e-mRNA   | B-Cell Functions, CD molecules, Inflammation                                                               | NM_011851.3:1600    | 1.54             | 5.90E-06 |
| Oas2-mRNA   | Basic Cell Functions                                                                                       | NM_145227.3:414     | 4.07             | 7.48E-06 |
| Fcgr2b-mRNA | Antigen Processing, B-Cell Functions, CD molecules, Inflammation, Interleukins, MHC, Transporter Functions | NM_001077189.1:1225 | 2.38             | 7.55E-06 |
| Ltbr-mRNA   | Apoptosis, TNF Superfamily                                                                                 | NM_010736.3:1962    | 0.274            | 8.11E-06 |
| Saa1-mRNA   | Adhesion, Cytokines & Receptors, Innate, Macrophage Functions                                              | NM_009117.3:351     | -2.47            | 8.41E-06 |
| Smn1-mRNA   | Cancer Progression                                                                                         | NM_011420.2:390     | 0.24             | 9.88E-06 |
| Itgb4-mRNA  | Adhesion, CD molecules                                                                                     | NM_001005608.2:3355 | 1.26             | 1.04E-05 |
| Bax-mRNA    | Apoptosis, Transporter Functions                                                                           | NM_007527.3:735     | 0.573            | 1.24E-05 |
| Bst2-mRNA   | CD molecules, Humoral, Innate                                                                              | NM_198095.2:468     | 2.4              | 1.28E-05 |
| Igf2r-mRNA  | Apoptosis, CD molecules, Transporter Functions                                                             | NM_010515.1:2585    | 0.723            | 1.30E-05 |
| Traf3-mRNA  | Apoptosis, Cytokines & Receptors, Innate, TLR                                                              | NM_001048206.1:6385 | 0.526            | 2.45E-05 |
| Ikzf2-mRNA  | T-Cell Functions                                                                                           | NM_011770.4:7230    | 1.22             | 2.52E-05 |
| Ddx58-mRNA  | Innate, Interferon                                                                                         | NM_172689.3:1751    | 1.32             | 3.00E-05 |
| Ccl27a-mRNA | Cytokines & Receptors                                                                                      | NM_001048179.1:265  | -0.793           | 3.15E-05 |

**Table 2. List of Top 20 differential expression of immune transcripts in 1E5 versus autochthonous model.**

| Transcript   | Gene.sets                                                                       | probe.ID            | Log2 fold change | P-value  |
|--------------|---------------------------------------------------------------------------------|---------------------|------------------|----------|
| Birc5-mRNA   | Apoptosis, Cell Cycle, Cytokines & Receptors                                    | NM_009689.2:237     | 1.67             | 3.78E-08 |
| Hif1a-mRNA   | Apoptosis, Cancer Progression                                                   | NM_010431.2:1294    | 0.653            | 7.39E-08 |
| Runx1-mRNA   |                                                                                 | NM_001111021.1:3055 | -1.36            | 1.32E-07 |
| Psm2-mRNA    | Cancer Progression                                                              | NM_008944.2:136     | 0.218            | 4.69E-07 |
| Ltbr-mRNA    | Apoptosis, TNF Superfamily                                                      | NM_010736.3:1962    | 0.301            | 2.77E-06 |
| Tfe3-mRNA    | Humoral                                                                         | NM_172472.3:2715    | -0.56            | 3.63E-06 |
| Tfrc-mRNA    | CD molecules, Transporter Functions                                             | NM_011638.3:1930    | 0.905            | 6.57E-06 |
| Saa1-mRNA    | Adhesion, Cytokines & Receptors, Innate, Macrophage Functions                   | NM_009117.3:351     | -2.45            | 8.98E-06 |
| Bax-mRNA     | Apoptosis, Transporter Functions                                                | NM_007527.3:735     | 0.586            | 9.66E-06 |
| Smad4-mRNA   | Cancer Progression                                                              | NM_008540.2:2885    | -0.314           | 1.88E-05 |
| Ccl27a-mRNA  | Cytokines & Receptors                                                           | NM_001048179.1:265  | -0.773           | 2.64E-05 |
| Dusp4-mRNA   | Basic Cell Functions, Innate                                                    | NM_176933.4:2200    | 1.29             | 3.53E-05 |
| Mapk14-mRNA  | Innate, Senescence, Transporter Functions                                       | NM_001168513.1:114  | 0.246            | 4.33E-05 |
| Glycam1-mRNA | Adhesion                                                                        | NM_008134.2:124     | -5.41            | 4.39E-05 |
| Casp1-mRNA   | Cytokines & Receptors, Innate, Interleukins, Microglial Functions               | NM_009807.2:259     | 1.01             | 5.58E-05 |
| Tank-mRNA    | Basic Cell Functions, Innate                                                    | NM_011529.1:491     | 0.334            | 8.05E-05 |
| Ctsl-mRNA    | Basic Cell Functions                                                            | NM_009984.3:45      | -0.688           | 8.31E-05 |
| Jak3-mRNA    | B-Cell Functions, Cytokines & Receptors, Innate, Interleukins, T-Cell Functions | NM_010589.5:145     | -0.706           | 8.42E-05 |
| Ilkzf1-mRNA  | B-Cell Functions, NK Cell Functions, T-Cell Functions                           | NM_001025597.1:4420 | -1.66            | 1.22E-04 |
| Psm7-mRNA    | Basic Cell Functions                                                            | NM_011187.1:184     | 0.215            | 1.65E-04 |

**Table 3. List of Top 20 differential expression of immune transcripts in 1E4 versus autochthonous model.**

| Transcript     | Gene sets                                                                            | probe.ID            | Log2 fold change | P-value  |
|----------------|--------------------------------------------------------------------------------------|---------------------|------------------|----------|
| Glycam1-mRNA   | Adhesion                                                                             | NM_008134.2:124     | -9.09            | 1.34E-07 |
| Itgb4-mRNA     | Adhesion, CD molecules                                                               | NM_001005608.2:3355 | 1.73             | 2.23E-07 |
| Birc5-mRNA     | Apoptosis, Cell Cycle, Cytokines & Receptors                                         | NM_009689.2:237     | 1.43             | 2.83E-07 |
| Saa1-mRNA      | Adhesion, Cytokines & Receptors, Innate, Macrophage Functions                        | NM_009117.3:351     | -3.13            | 5.19E-07 |
| Il6ra-mRNA     | CD molecules, Chemokines & Receptors, Cytokines & Receptors, Interleukins            | NM_010559.2:2825    | -1.61            | 5.86E-07 |
| Hif1a-mRNA     | Apoptosis, Cancer Progression                                                        | NM_010431.2:1294    | 0.527            | 1.12E-06 |
| Tnfrsf10b-mRNA | Apoptosis, CD molecules, TNF Superfamily                                             | NM_020275.3:1625    | 0.934            | 1.40E-06 |
| C4b-mRNA       | Complement Pathway, Humoral, Inflammation, Innate                                    | NM_009780.2:491     | -2.51            | 6.68E-06 |
| Il1rap-mRNA    | Cytokines & Receptors, Inflammation, Innate, Interleukins                            | NM_008364.2:2415    | 0.844            | 7.95E-06 |
| Cd200-mRNA     | CD molecules                                                                         | NM_010818.3:686     | 1.19             | 8.63E-06 |
| Casp1-mRNA     | Cytokines & Receptors, Innate, Interleukins, Microglial Functions                    | NM_009807.2:259     | 1.13             | 1.76E-05 |
| Gpi1-mRNA      | Apoptosis, Cytokines & Receptors, Humoral                                            | NM_008155.4:1540    | 0.536            | 2.43E-05 |
| Mif-mRNA       | B-Cell Functions, Cytokines & Receptors, Inflammation, Innate, Transporter Functions | NM_010798.2:373     | 0.623            | 2.84E-05 |
| Vegfa-mRNA     | Apoptosis, Cytokines & Receptors, Macrophage Functions, T-Cell Functions             | NM_001025250.3:3015 | 1.78             | 2.85E-05 |
| Kit-mRNA       | CD molecules, Cytokines & Receptors                                                  | NM_001122733.1:4275 | 1.06             | 3.52E-05 |
| Tank-mRNA      | Basic Cell Functions, Innate                                                         | NM_011529.1:491     | 0.353            | 4.55E-05 |
| Lcp1-mRNA      | T-Cell Functions, Transporter Functions                                              | NM_001247984.1:3344 | -0.587           | 5.19E-05 |
| Bax-mRNA       | Apoptosis, Transporter Functions                                                     | NM_007527.3:735     | 0.491            | 6.44E-05 |
| Atm-mRNA       | Apoptosis, B-Cell Functions, Cell Cycle, Senescence                                  | NM_007499.2:5543    | -0.616           | 7.50E-05 |
| App-mRNA       | Apoptosis, Cell Cycle, Innate, Transporter Functions                                 | NM_007471.2:511     | 0.641            | 8.04E-05 |

**Table 4. Published studies on immunotherapy response in syngeneic murine models.**

| Reference                                       | Model                                                            | No. tumor cells inoculated | Tumor size (mm <sup>3</sup> ) | Time to start treating (d) | Outcome                                                                                                                                       |
|-------------------------------------------------|------------------------------------------------------------------|----------------------------|-------------------------------|----------------------------|-----------------------------------------------------------------------------------------------------------------------------------------------|
| Kim et al. <i>PNAS</i> 2014                     | 4T1                                                              | 5.00E+06                   | 400                           | 11                         | Tumor eradication with PD-1/CTLA4 at day 15.                                                                                                  |
|                                                 | CT26                                                             | 5.00E+06                   | 400                           | 11                         | Tumor eradication with PD-1/CTLA4 at day 25.                                                                                                  |
| Lian et al. <i>Sci Rep</i> 2019                 | 4T1                                                              | 1.00E+05                   | not reported                  | 24                         | PD-L1/CD74 treatment, dual blockade reduced lung metastasis.                                                                                  |
| Clift et al. <i>Cancer Res</i> 2019             | 4T1/EMT6                                                         | 1.00E+05                   | 100-150                       | not reported               | PD-L1 blockade significantly inhibited tumor growth when combined with PVHA.                                                                  |
| Sun et al. <i>Mol Cancer Ther</i> 2020          | 4T1                                                              | 1.00E+06                   | 100-150                       | 3                          | Anti-CTLA-4 and anti-PD-1 in combination promoted the infiltration of T cells.                                                                |
| Xie et al. <i>J Immunother Cancer</i> 2018      | 4T1                                                              | 5.00E+06                   | < 200                         | 5,8                        | AngII blockage enhance tumor sensitivity to checkpoint immunotherapy (ctla4/pd1).                                                             |
| Xu et al. <i>Clin Cancer Res</i> 2017           | EMT6                                                             | 5.00E+06                   | not reported                  | not reported               | NHS-muIL12 and avelumab combination therapy enhanced antitumor efficacy.                                                                      |
| Knudson et al. <i>Oncimmunology</i> 2018        | EMT6                                                             | 2.50E+05                   | 50-100                        | not reported               | Bifunctional checkpoint inhibitor of TGFβRII linked to the human anti-PD-L1 heavy chain reduced tumor burden.                                 |
|                                                 | 4T1                                                              | 5.00E+04                   | 50-100                        | not reported               |                                                                                                                                               |
| Zippelius et al. <i>Cancer Immunol Res</i> 2015 | EMT6                                                             | 2.50E+05                   | not reported                  | 16                         | Induced PD-L1 Expression Mediates Acquired Resistance to agonistic anti-CD40 treatment.                                                       |
|                                                 | MC38                                                             | 1.00E+06                   | not reported                  | 16                         |                                                                                                                                               |
| Lewis et al. <i>Oncimmunology</i> 2017          | EMT6                                                             | 1.50E+06                   | not reported                  | 7                          | IL-21 inhibition with CTLA4 blockade promoted tumor regression.                                                                               |
| Li et al. <i>Cancer Cell</i> 2018               | 4T1                                                              | 5.00E+04                   | <200                          | 6                          | A monoclonal antibody targeting glycosylated PD-L1 (gPD-L1) blocks PD-L1/PD-1 interaction and promotes PD-L1 internalization and degradation. |
|                                                 | EMT6                                                             | 5.00E+04                   | <200                          | 6                          |                                                                                                                                               |
| Liu et al. <i>Cancer Discovery</i> 2016         | 4T1.2                                                            | 2.00E+04                   | 40-80                         | 16                         | Neo-adjuvant PD-1/CD-137 therapy had better efficacy than adjuvant .                                                                          |
|                                                 | 4T1.2                                                            | 5.00E+04                   | 40-80                         | 10                         | Increase in tumor-specific CD8+ T cells after neoadjuvant anti-PD-1+anti-CD137 therapy.                                                       |
|                                                 | E0771                                                            | 5.00E+04                   | 40-80                         | 16-18                      | Neo-adjuvant PD-1+CD-137 therapy had better efficacy than adjuvant.                                                                           |
| Liu et al. <i>Oncimmunology</i> 2019            | E0771                                                            | 2.00E+05                   | 50                            | 10                         | Guadecitabine in combination with AIT resulted in prolonged survival in both 4 T1 and E0771 breast cancer models.                             |
|                                                 | 4T1                                                              | 5.00E+04                   | 50                            | 10                         |                                                                                                                                               |
| Kasikara et al. <i>Cancer Res</i> 2019          | E0771                                                            | 1.00E+05                   | not reported                  | 10                         | Combination of TAM inhibitor (BMS-777607) and anti-PD-1improved tumor efficacy.                                                               |
| Messenheimer et al. <i>Clin Cancer Res</i> 2017 | MMTV-PyMT                                                        | 1.00E+06                   | <50                           | 7                          | Sequential combination of anti-OX40 and anti-PD-1 increased efficacy                                                                          |
| Nolan et al. <i>Sci Transl Med</i> 2018         | MMMTV-cre/Brc1 <sup>fl/fl</sup> /p53 <sup>+/+</sup> /TV-cre/Brc1 | 4.00E+04                   | 100                           | 21                         | Cisplatin treatment combined with dual anti-PD-1and anti-CTLA4 therapy substantially augmented antitumor immunity.                            |
| Young et al. <i>Plos One</i> 2016               | MMTV-PYMT                                                        | 1.00E+06                   | not reported                  | 14                         | Combination treatment with anti-CTLA4, anti-OX40 and radiation resulted in significantly extended survival                                    |
